# Supplementary material for: Carbonate-Anion Engineering Enables Humidity-Resistant Halide Solid Electrolytes with Superionic Conductivity
Source: Research Square preprint supplement (doi:10.21203/rs.3.rs-7842363/v1), 2026-01-22
Supplement: Supplementary file 1 [file 7297a1fa47b796b26517bc48.docx]

***Supplementary Information for***

# Carbonate-Anion Engineering Enables Humidity-Resistant Halide Solid Electrolytes with Superionic Conductivity

*Jiacong Li1,2,3,4†, Yuge Cao1,2†, Pushun Lu9,10 Kehao Tao6,7, Wujie Dong3,4,5, Junchao Chen8, Weiping Tang8, Zhan Yu11, Hong Zhu11 and Fuqiang Huang3,4,5**

1 Shanghai Institute of Ceramics, Chinese Academy of Sciences, Shanghai 200050, China.

2 Center of Materials Science and Optoelectronics Engineering, University of Chinese Academy of Sciences, Beijing, 100049, China.

3 Key laboratory of Artificial Intelligent Creation Extreme Energy Materials, School of Materials Science and Engineering, Shanghai Jiao Tong University, Shanghai, 200240, China.

4 School of Materials Science and Engineering and Zhang jiang Institute for Advanced Study (ZIAS), Shanghai Jiao Tong University, Shanghai, 200240, China.

5 Inner Mongolia Research Institute, Shanghai Jiao Tong University, Hohhot 010010.

6 National Key Laboratory of Advanced Micro and Nano Manufacture Technology, Shanghai Jiao Tong University, Shanghai, 200240, China.

7 Department of Micro/Nano Electronics, School of Electronic Information and Electrical Engineering, Shanghai Jiao Tong University, Shanghai, 200240, China.

8 School of Chemistry and Chemical Engineering, Shanghai Jiao Tong University, Shanghai 200240, China.

9 Eastern Institute for Advanced Study, Ningbo Institute of Digital Twin, Eastern Institute of Technology, Ningbo, 315200, China.

10 Zhejiang Key Laboratory of All-Solid-State Battery, Ningbo Key Laboratory of All-Solid-State Battery, Ningbo, 315200, China.

11 Global College, Shanghai Jiao Tong University, Shanghai, 200240, China

†These authors contributed equally to this work

* Corresponding author: Fuqiang Huang, e-mail: huangfq@sjtu.edu.cn


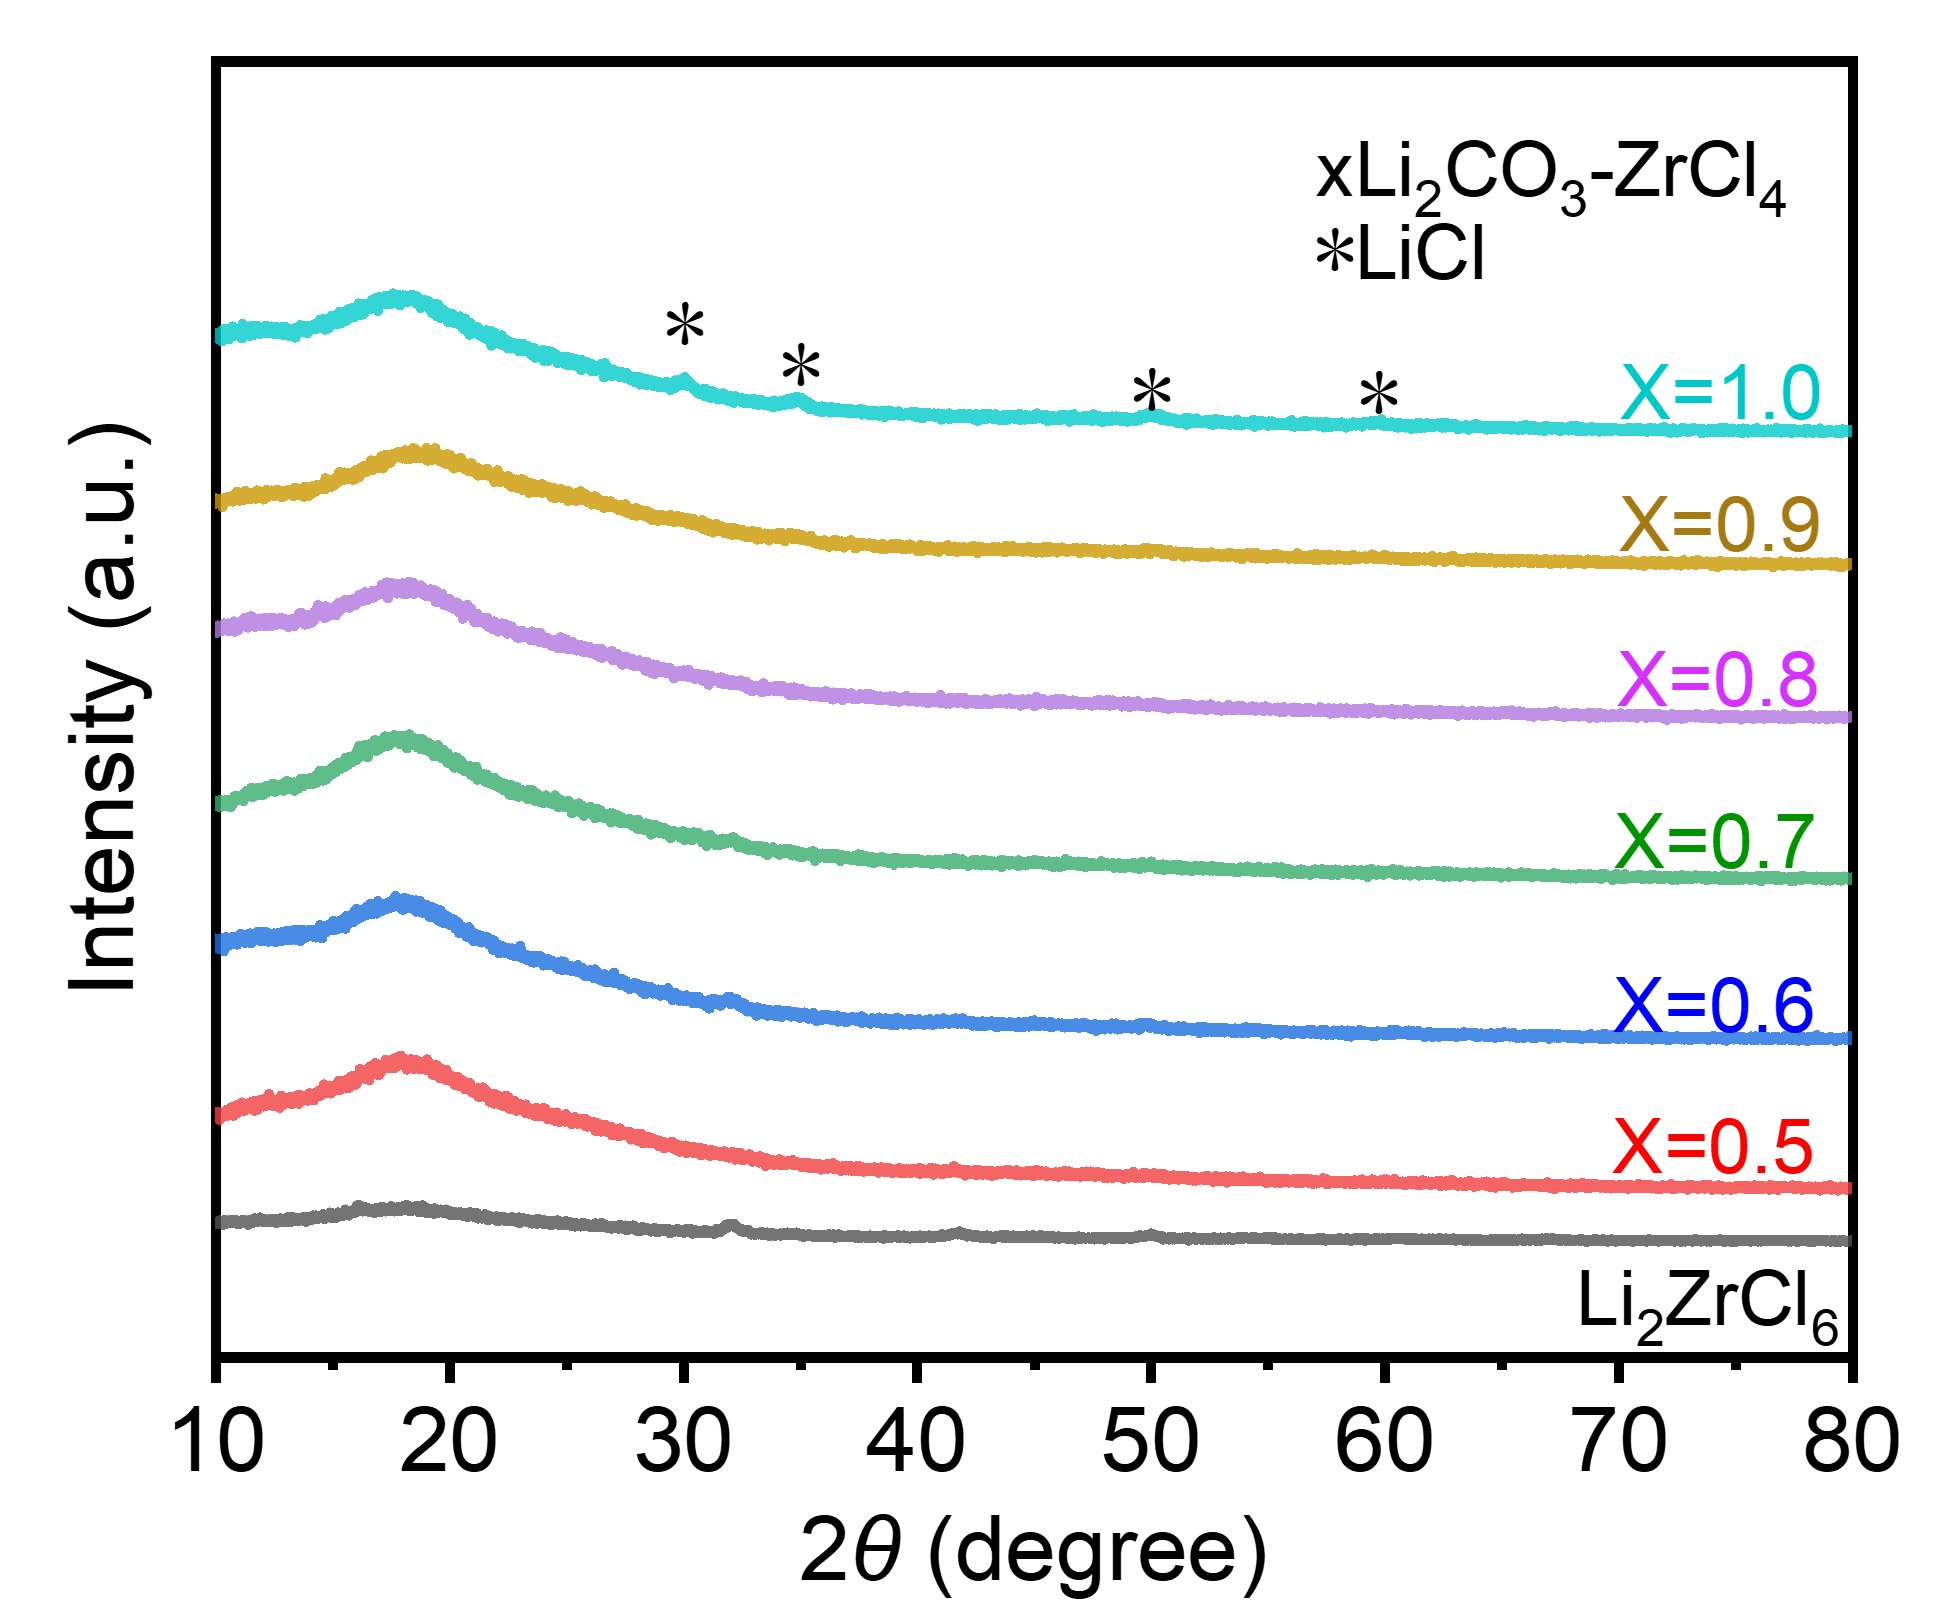


**Supplementary Fig. 1** Lab-based XRD patterns for *x*Li2CO3-ZrCl4. The large peak between 10-22° is the diffraction peak of the Kapton film used to seal the tested powders to avoid any air exposure.


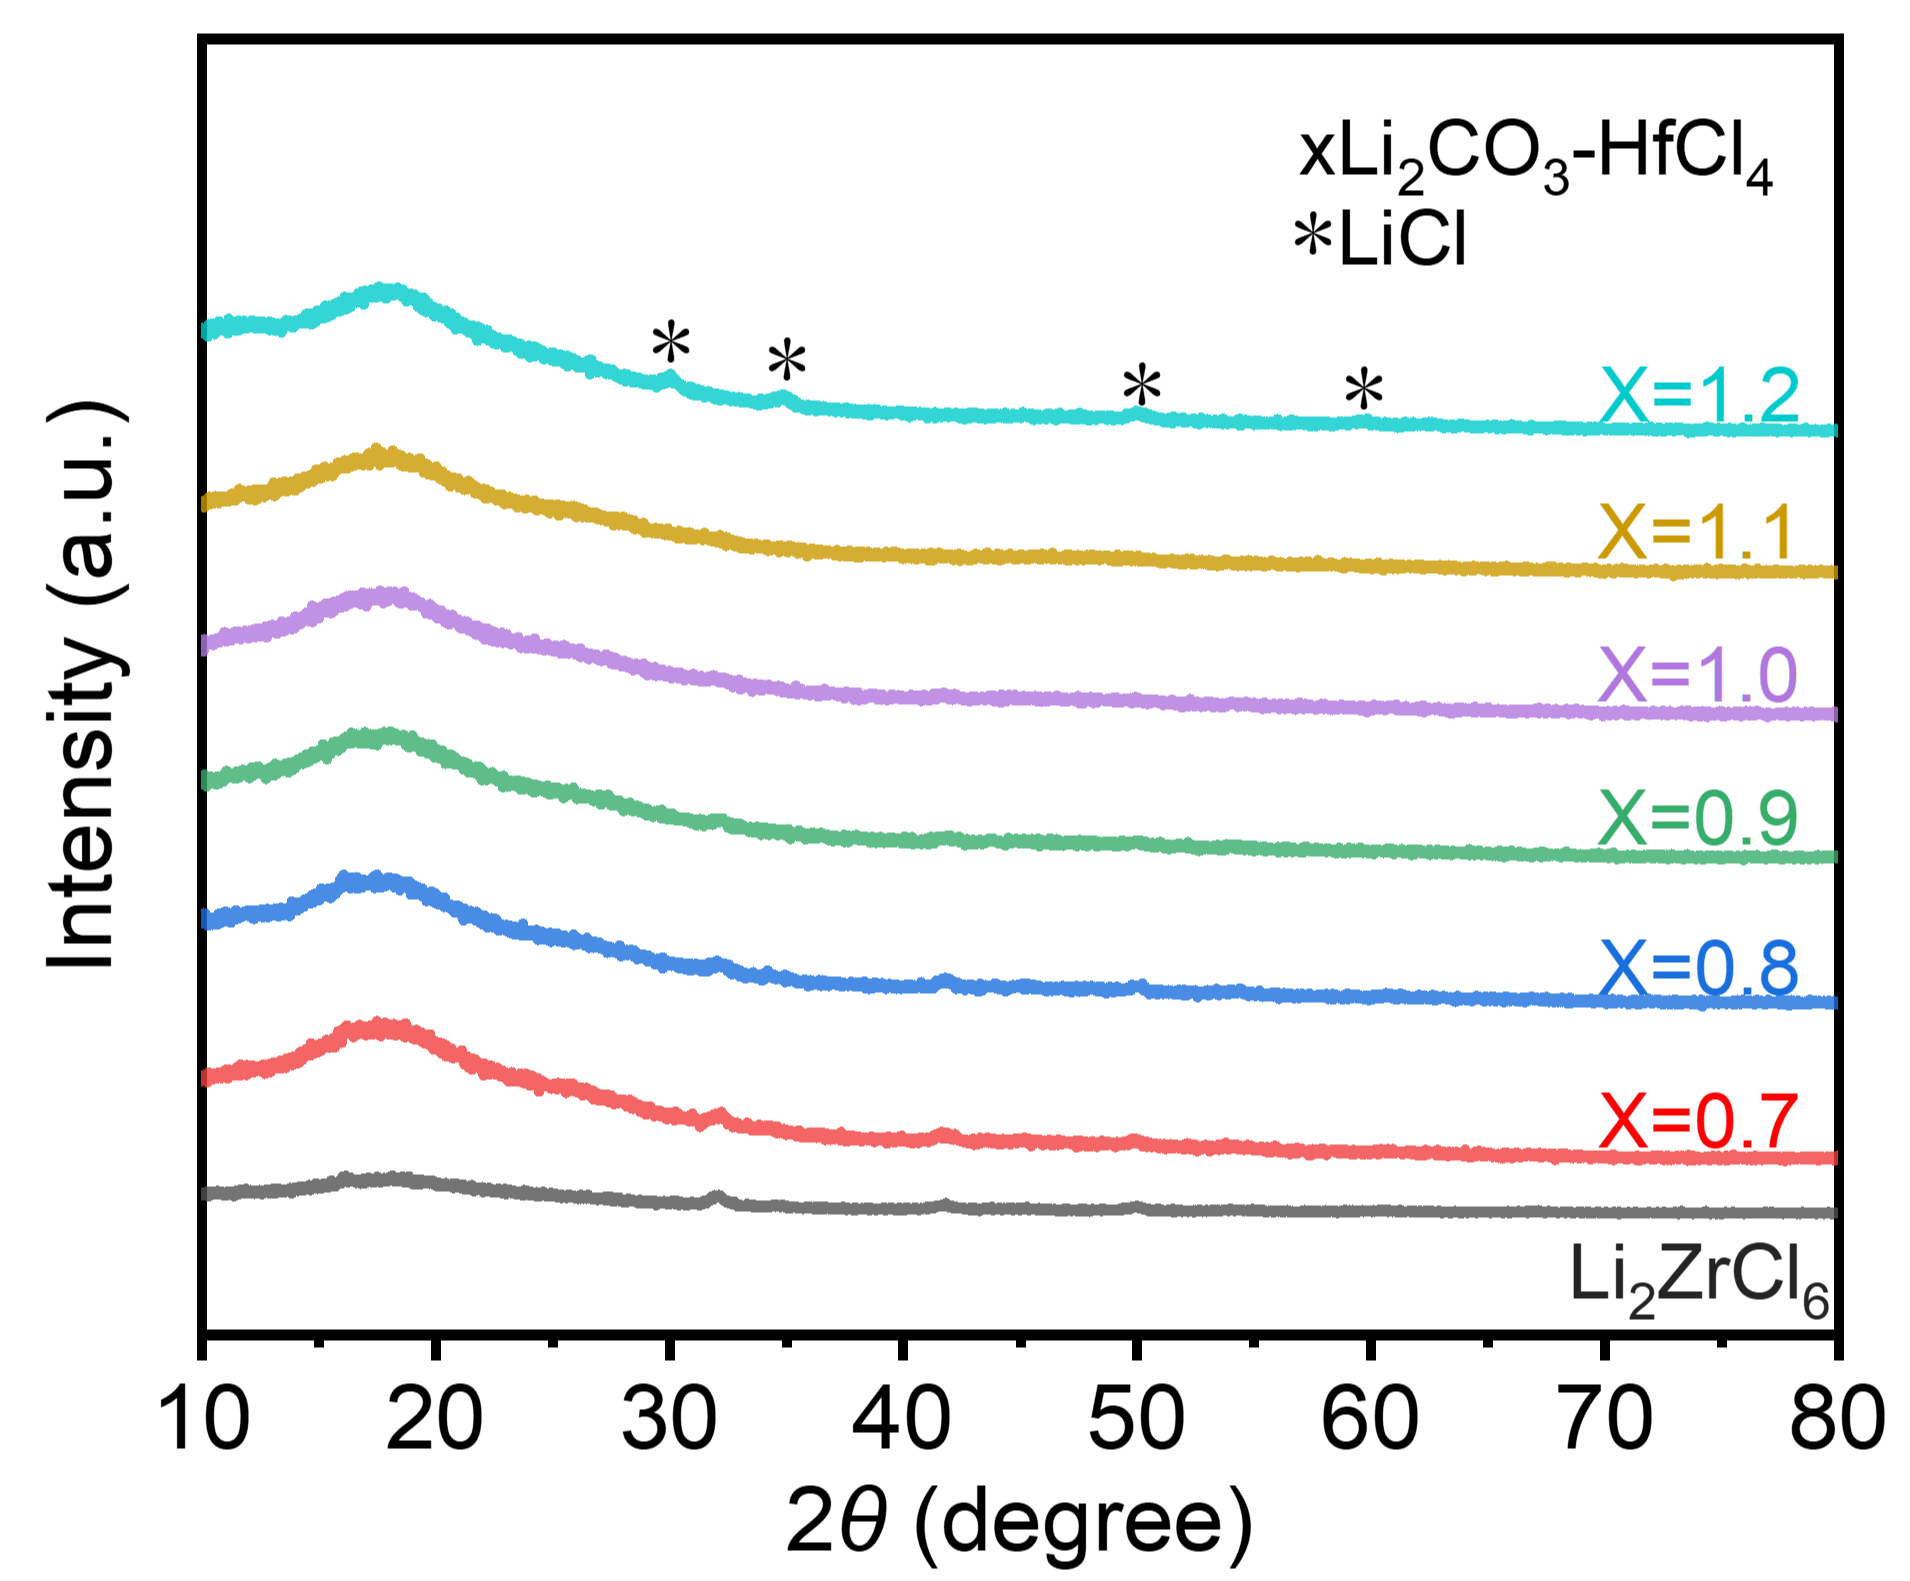


**Supplementary Fig. 2** Lab-based XRD patterns for *x*Li2CO3-HfCl4. The large peak between 10-22° is the diffraction peak of the Kapton film used to seal the tested powders to avoid any air exposure.


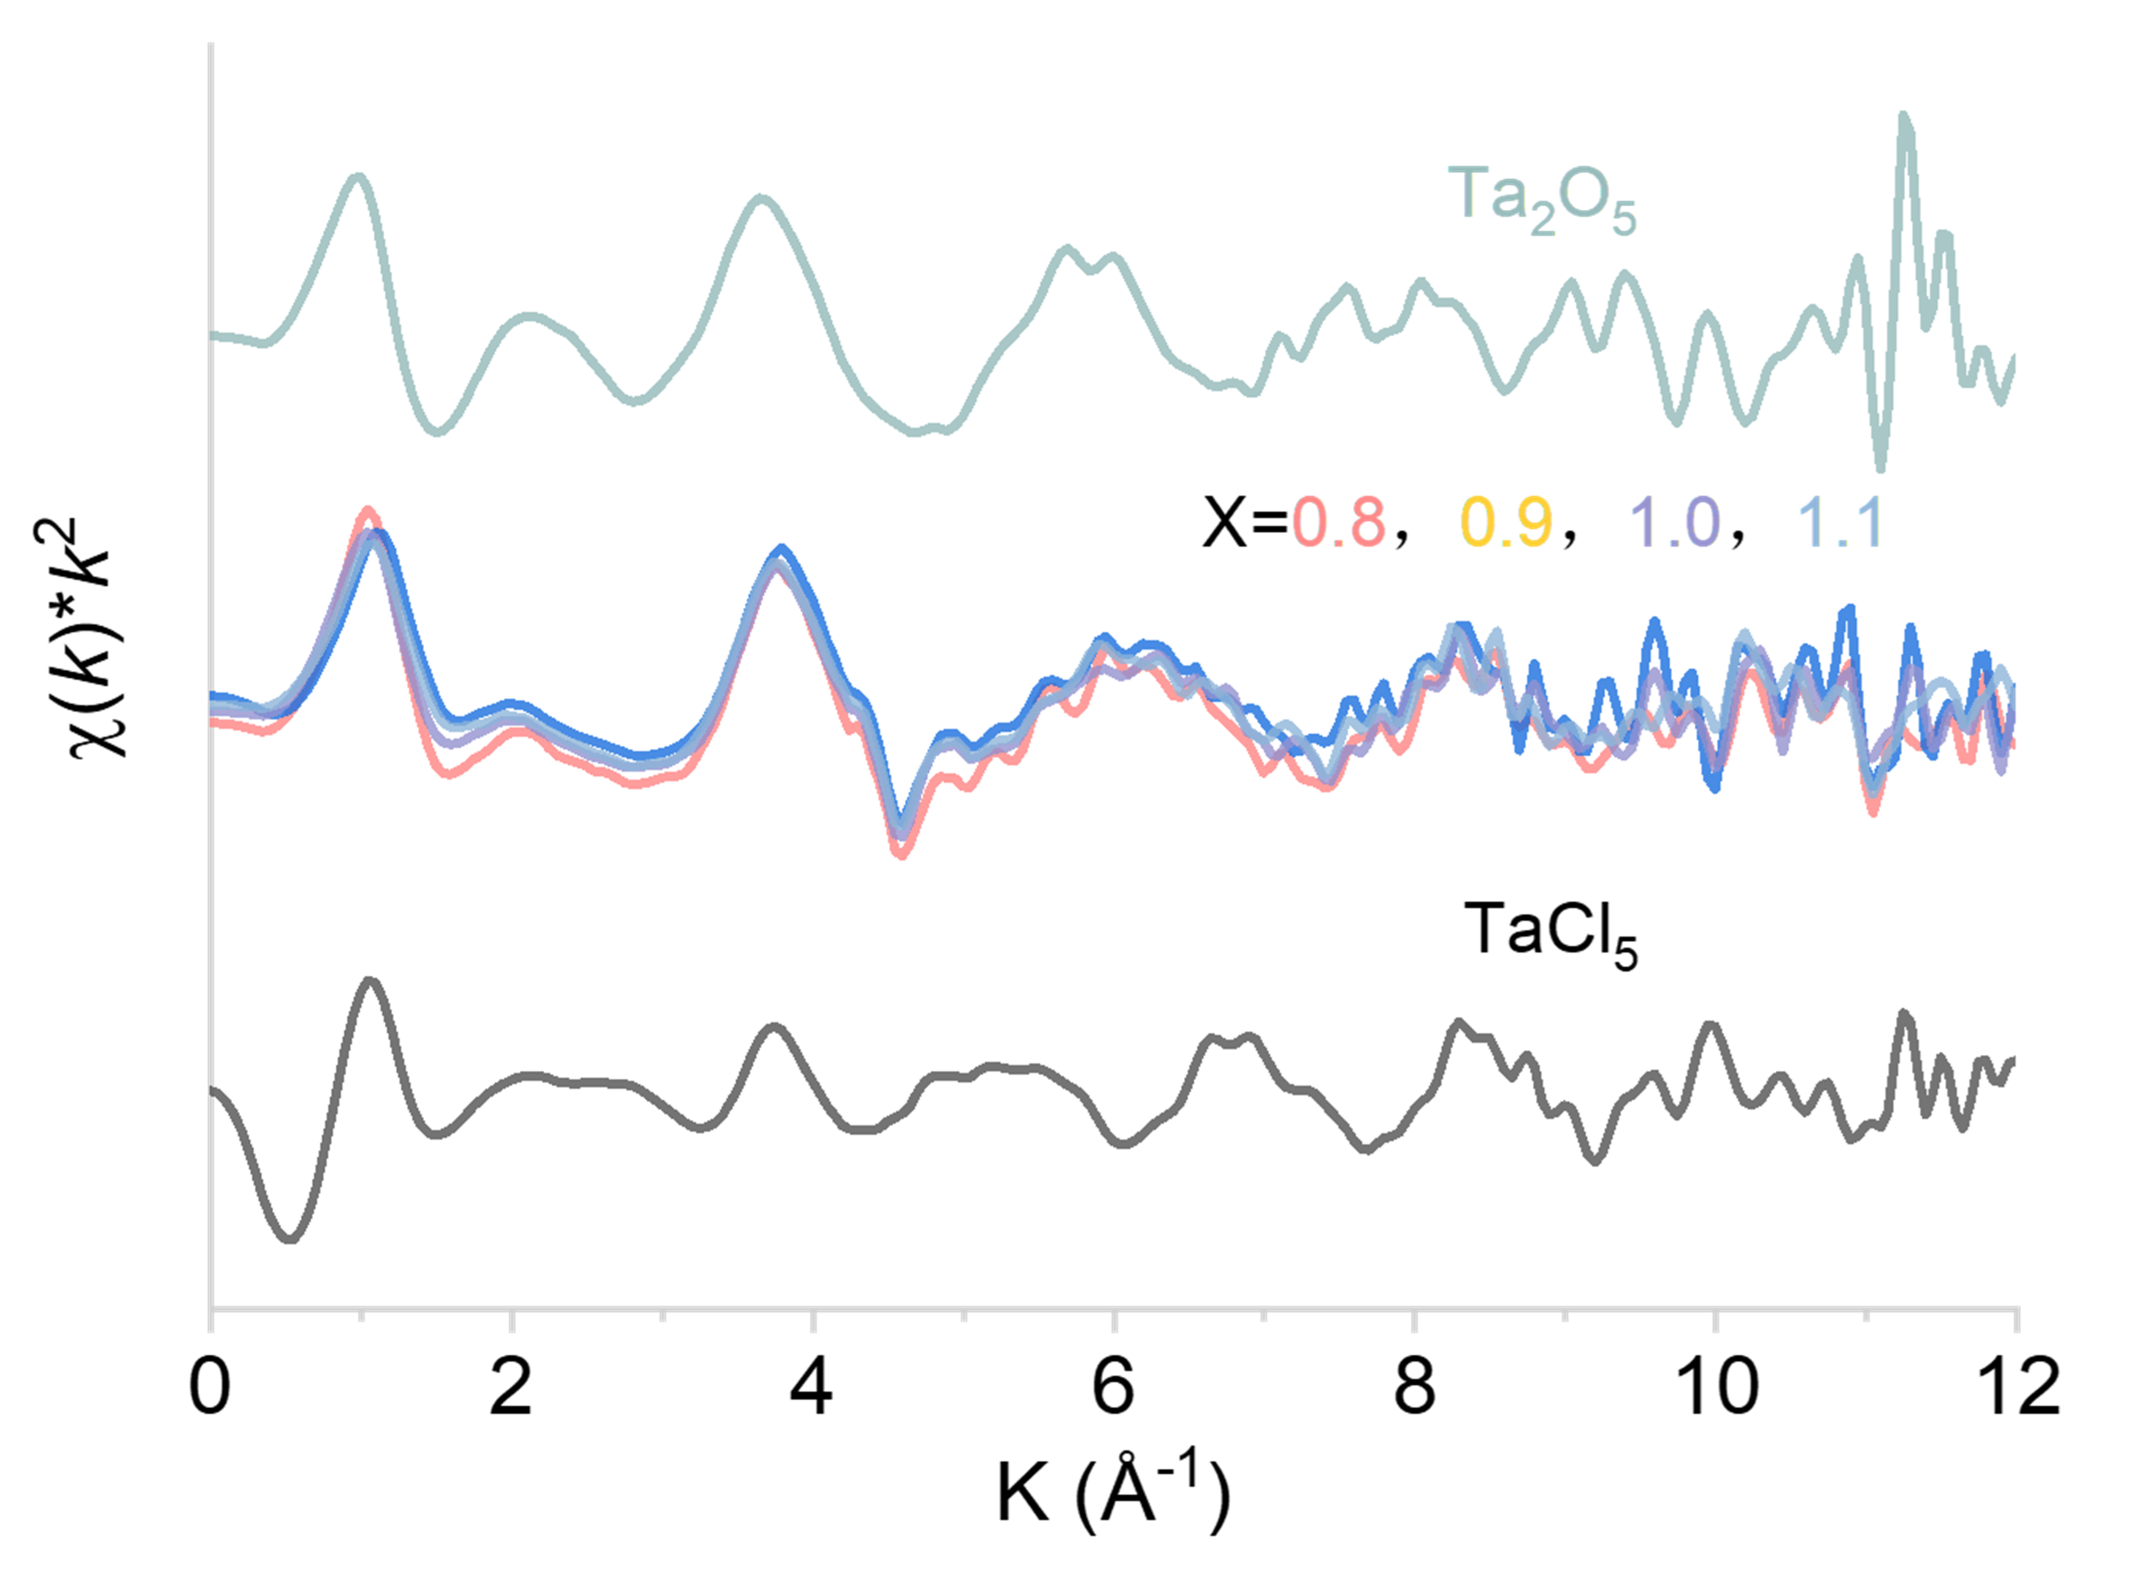


**Supplementary Fig. 3** EXAFS for *x*Li2CO3-TaCl5 amorphous SEs, as well as Ta2O5 and TaCl5 at Ta *L3*-edge.


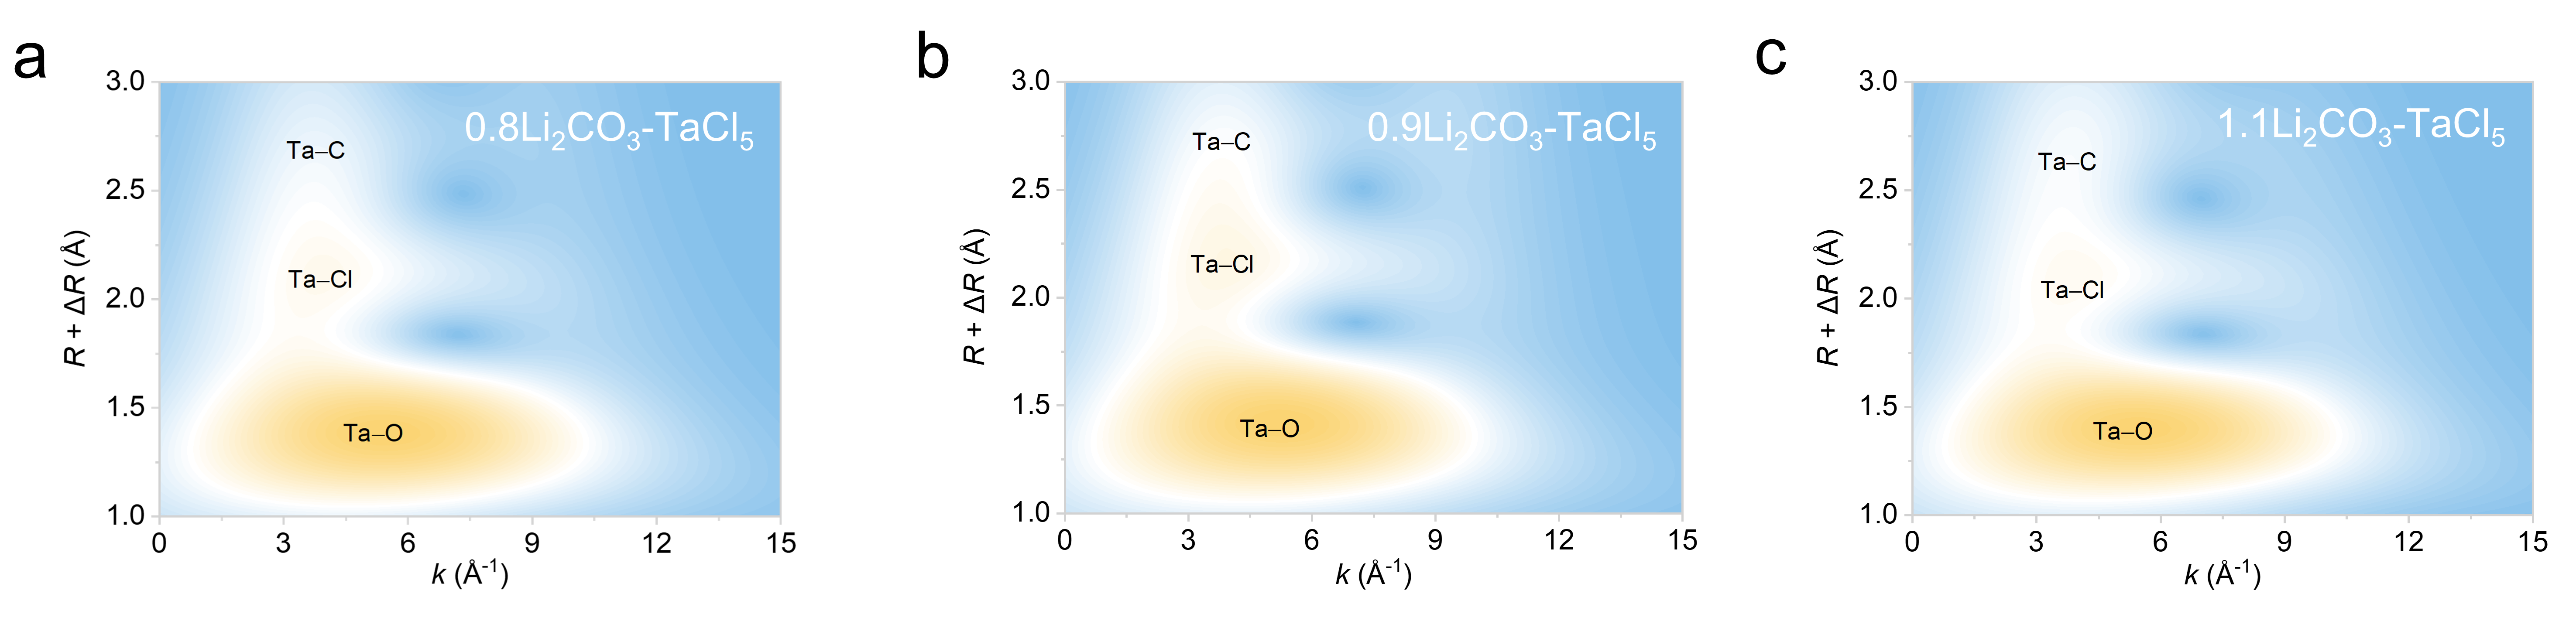


**Supplementary Fig. 4** Wavelet-transformed (WT) EXAFS spectra of 0.8Li2CO3-TaCl5 (**a**), 0.9Li2CO3-TaCl5 (**b**), 1.1Li2CO3-TaCl5 (**c**) at Ta *L3*-edge with a *k*2 weighting. *R* + Δ*R* represents the radial distance, and Δ*R* indicates the distance correction due to phase shifts.


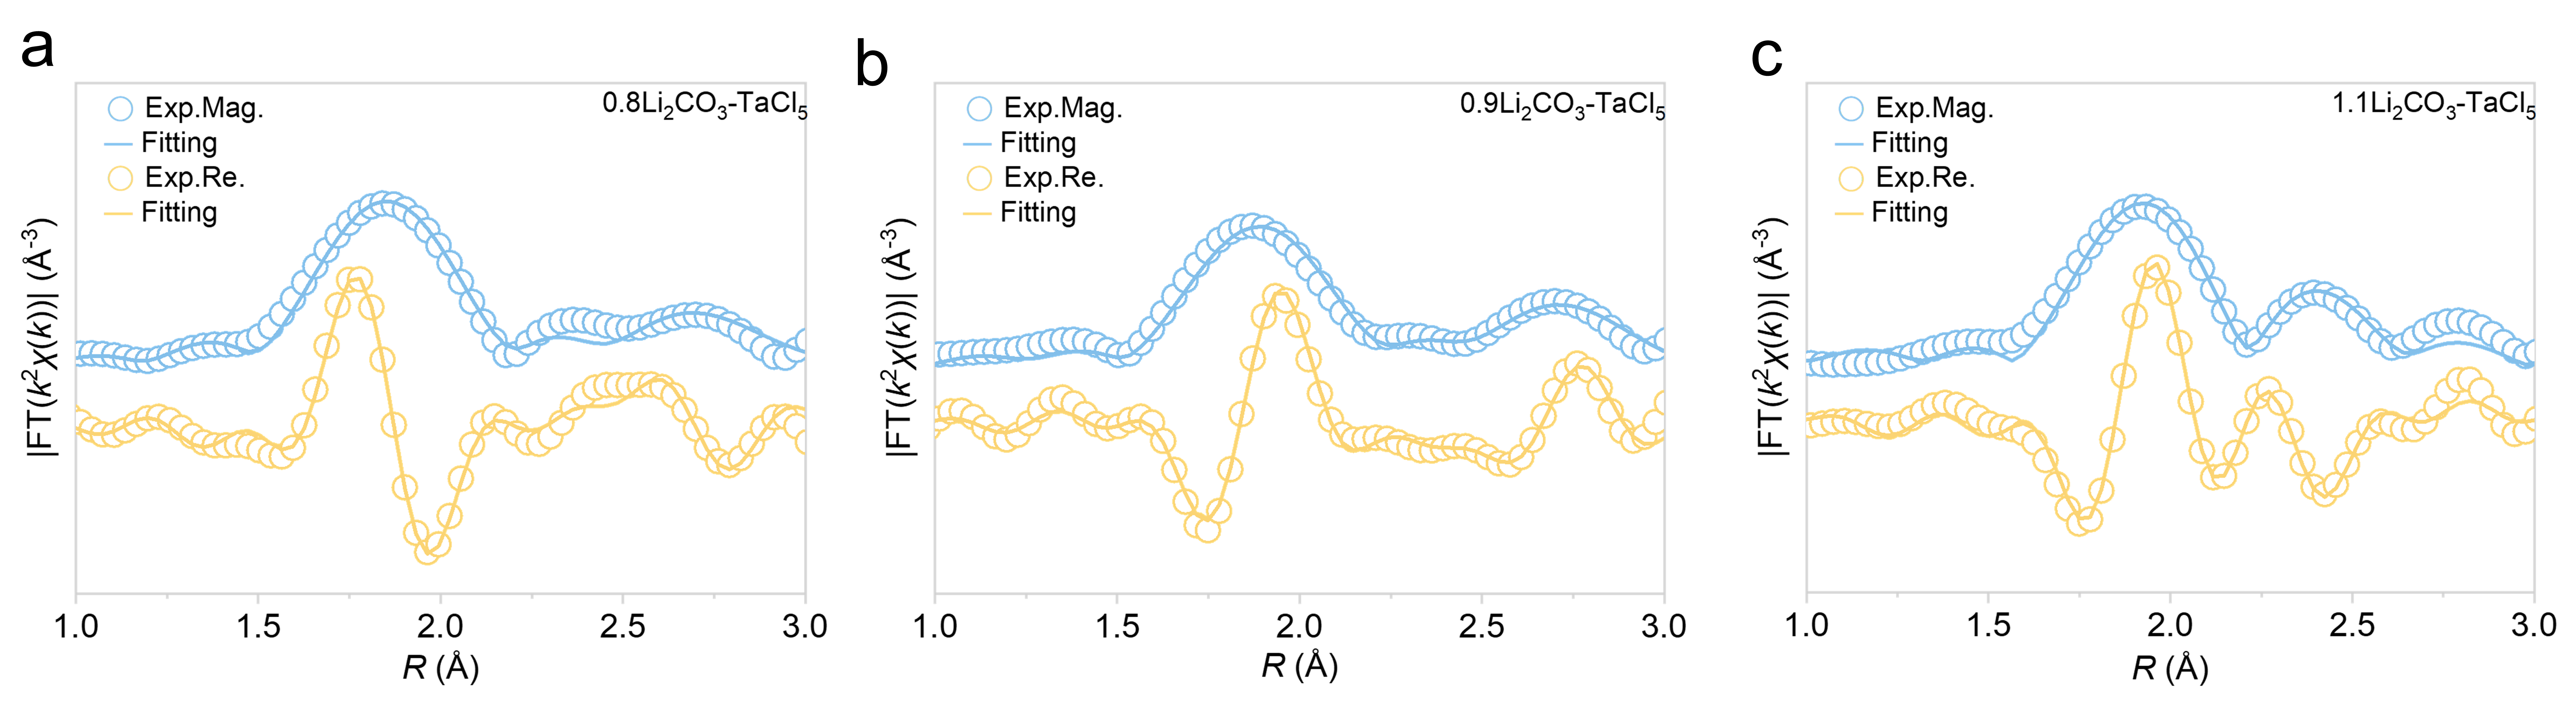


**Supplementary Fig. 5** Fourier-transform (FT) EXAFS fitting for the Ta *L3*-edge spectrum of 0.8Li2CO3-TaCl5 (**a**), 0.9Li2CO3-TaCl5 (**b**), and 1.1Li2CO3-TaCl5 (**c**).


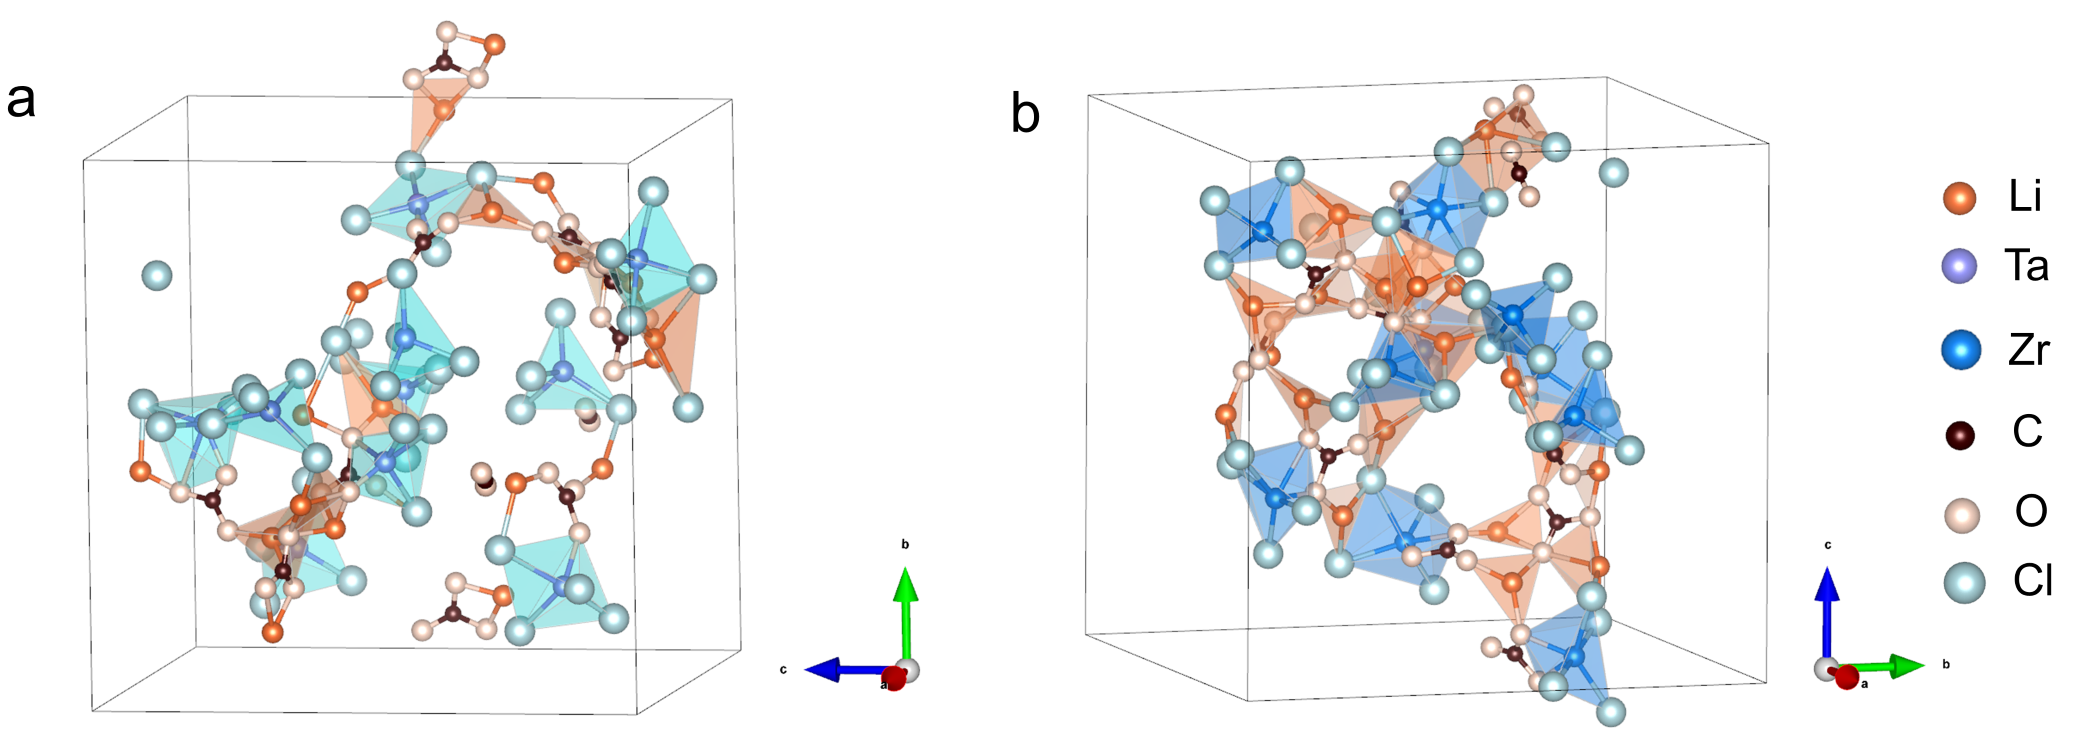


**Supplementary Fig. 6** Computed structure of amorphous LTCCO (**a**) and LZCCO (**b**) at 1200 K generated from melt-and-quench AIMD simulations.


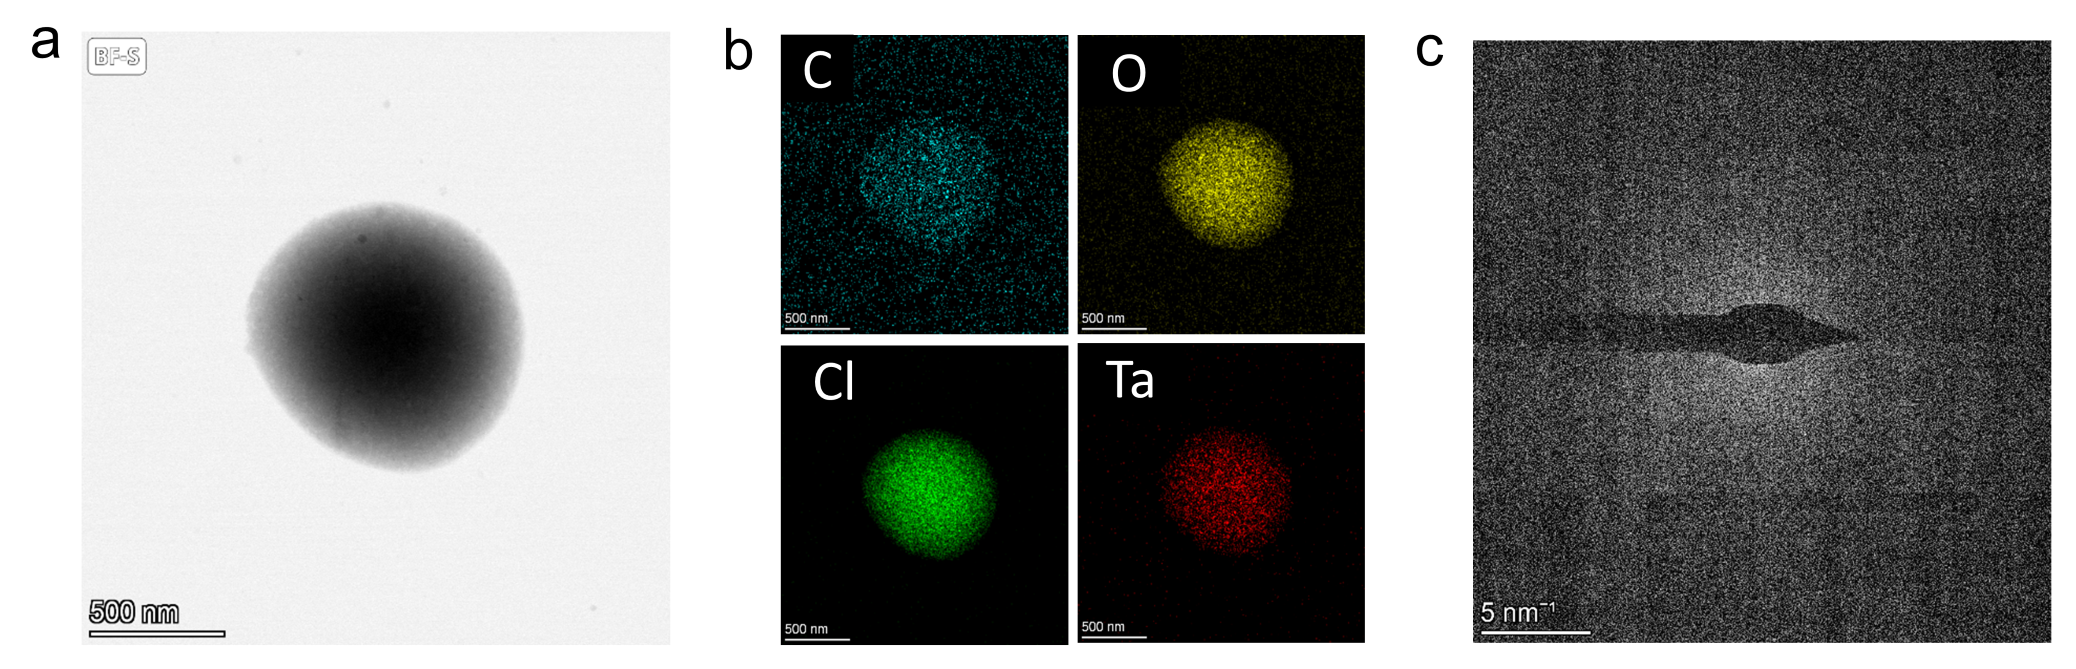


**Supplementary Fig. 7** High-resolution transmission electron microscopy (HRTEM) images of LTCCO. Bright-field image (**a**), energy-dispersive X-ray spectroscopy (EDS) mapping (**b**) and selected-area electron diffraction (SAED) image (**c**) of LTCCO.


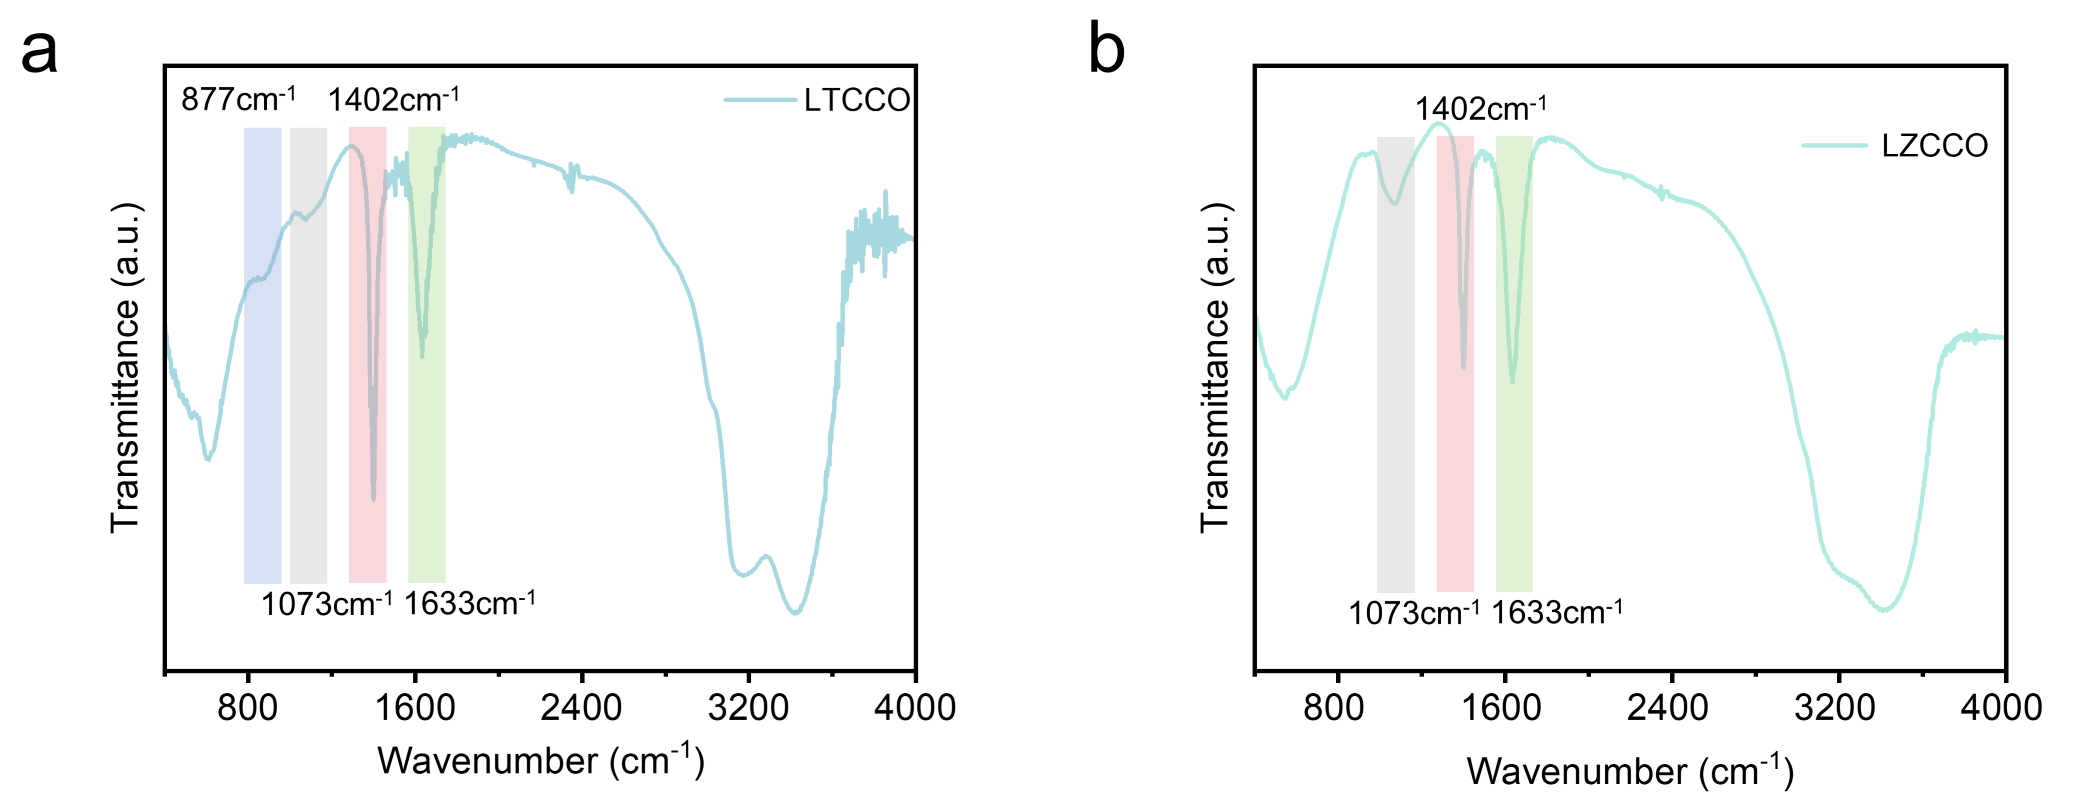


**Supplementary Fig. 8** Fourier transform infrared spectroscopy (FT-IR) of LTCCO (**a**), and LZCCO (**b**).


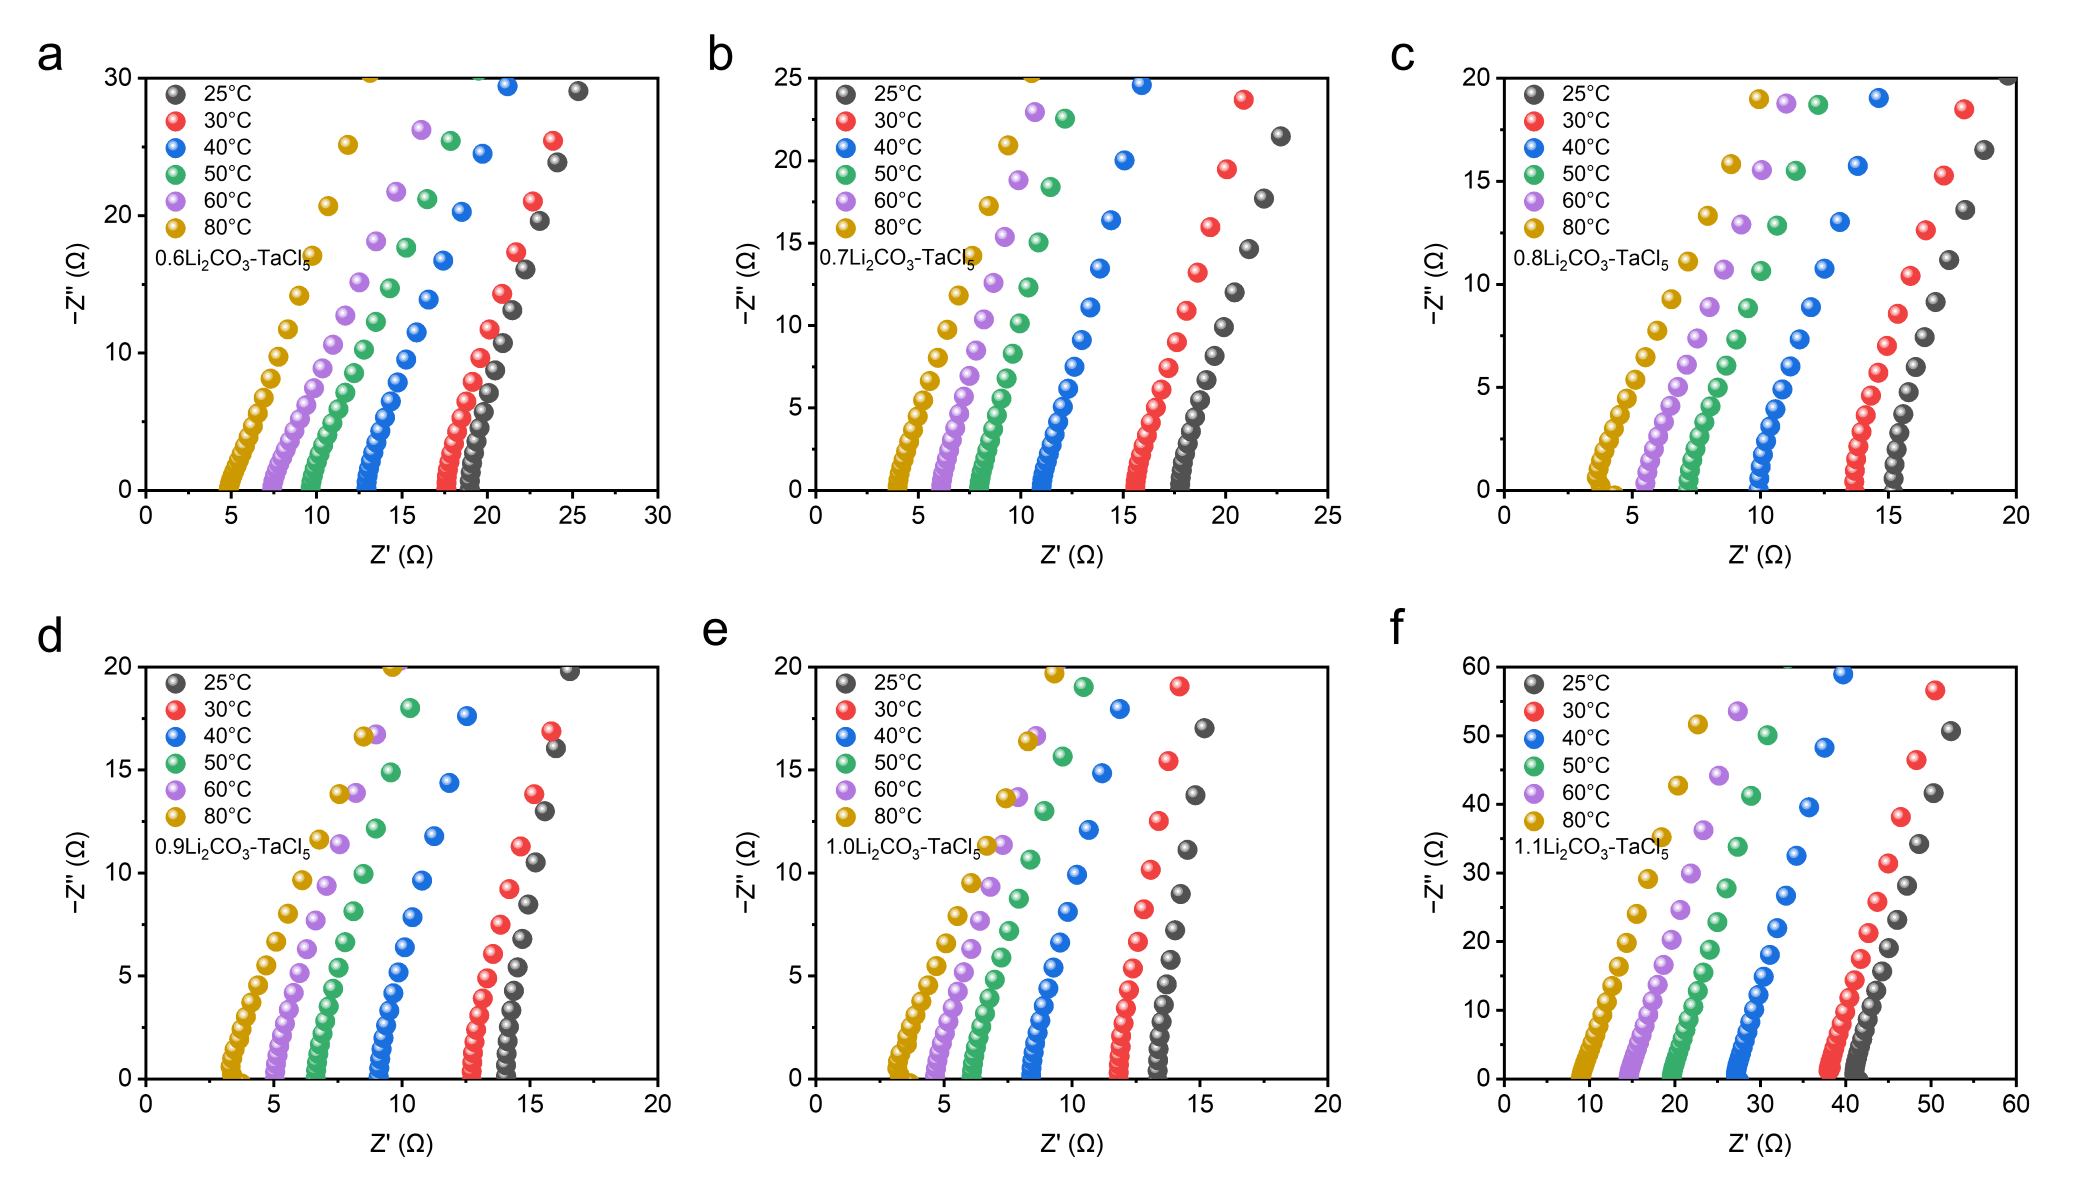


**Supplementary Fig. 9** Normalized Nyquist plots for the *x*Li2CO3-TaCl5 cold-pressed pellets at various temperatures.


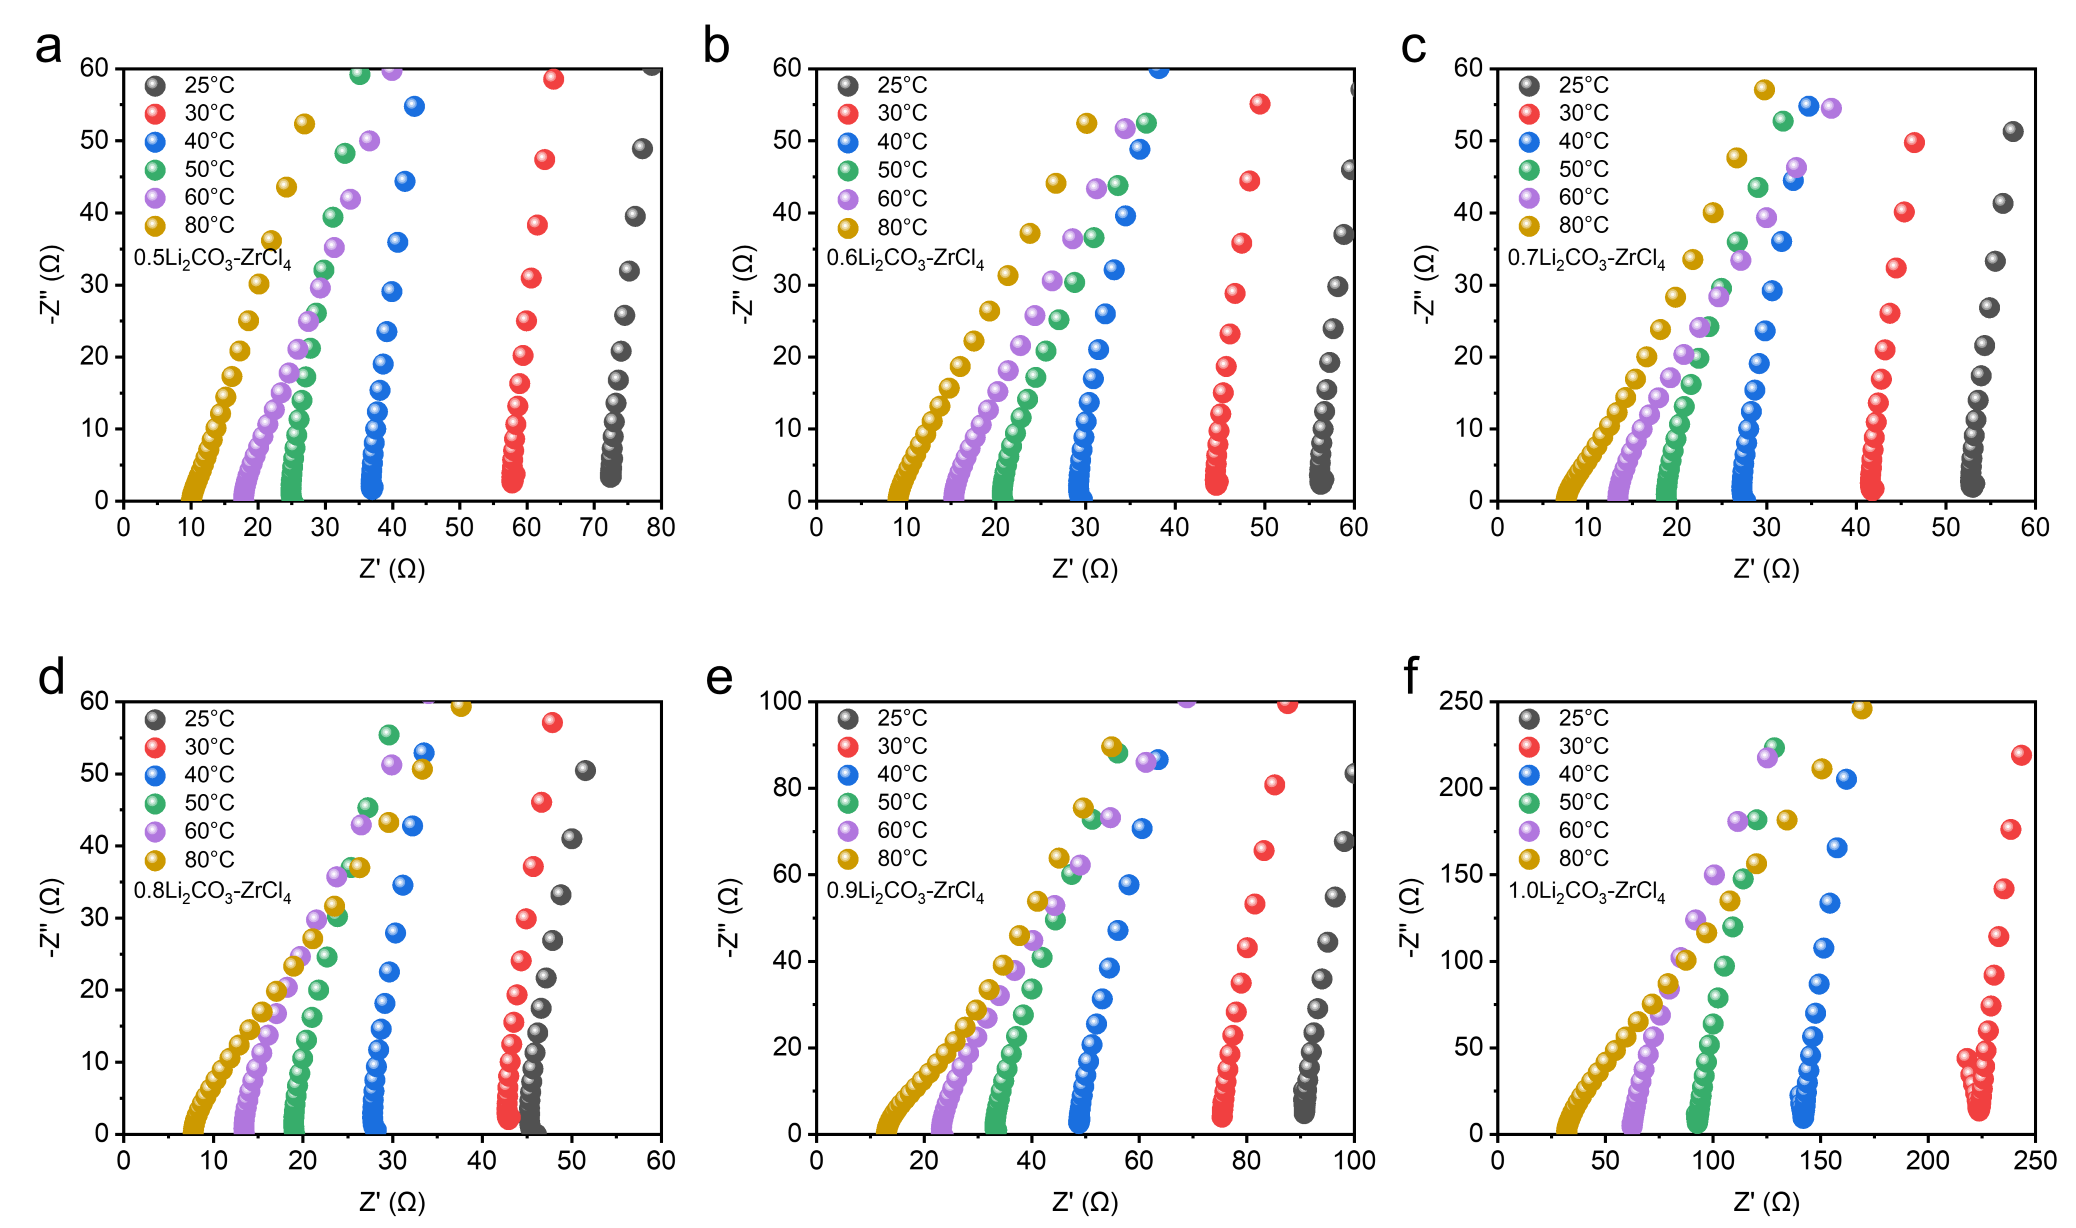


**Supplementary Fig. 10** Normalized Nyquist plots for the *x*Li2CO3-ZrCl4 cold-pressed pellets at various temperatures.


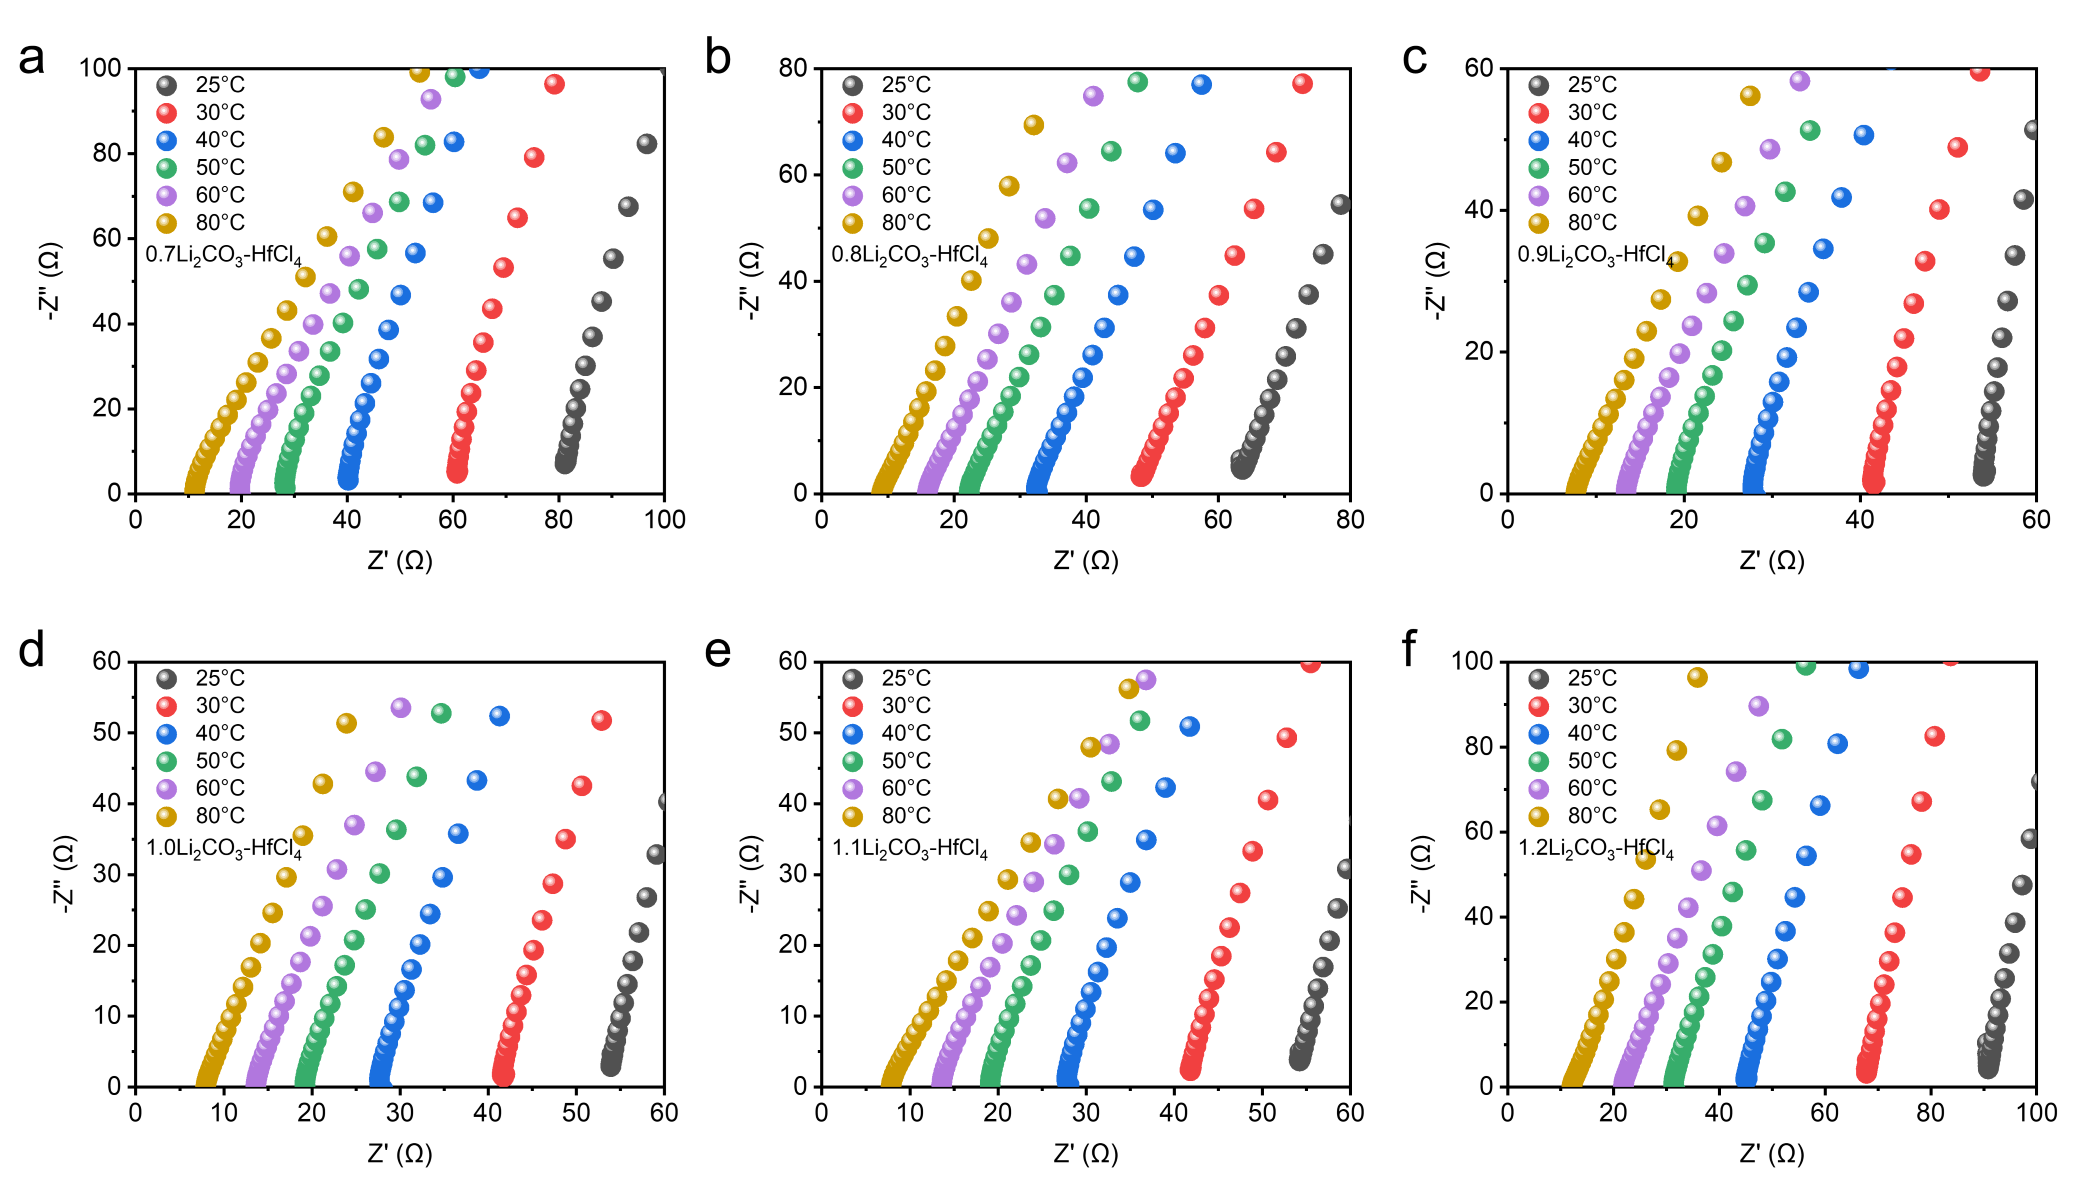


**Supplementary Fig. 11** Normalized Nyquist plots for the *x*Li2CO3-HfCl4 cold-pressed pellets at various temperatures.


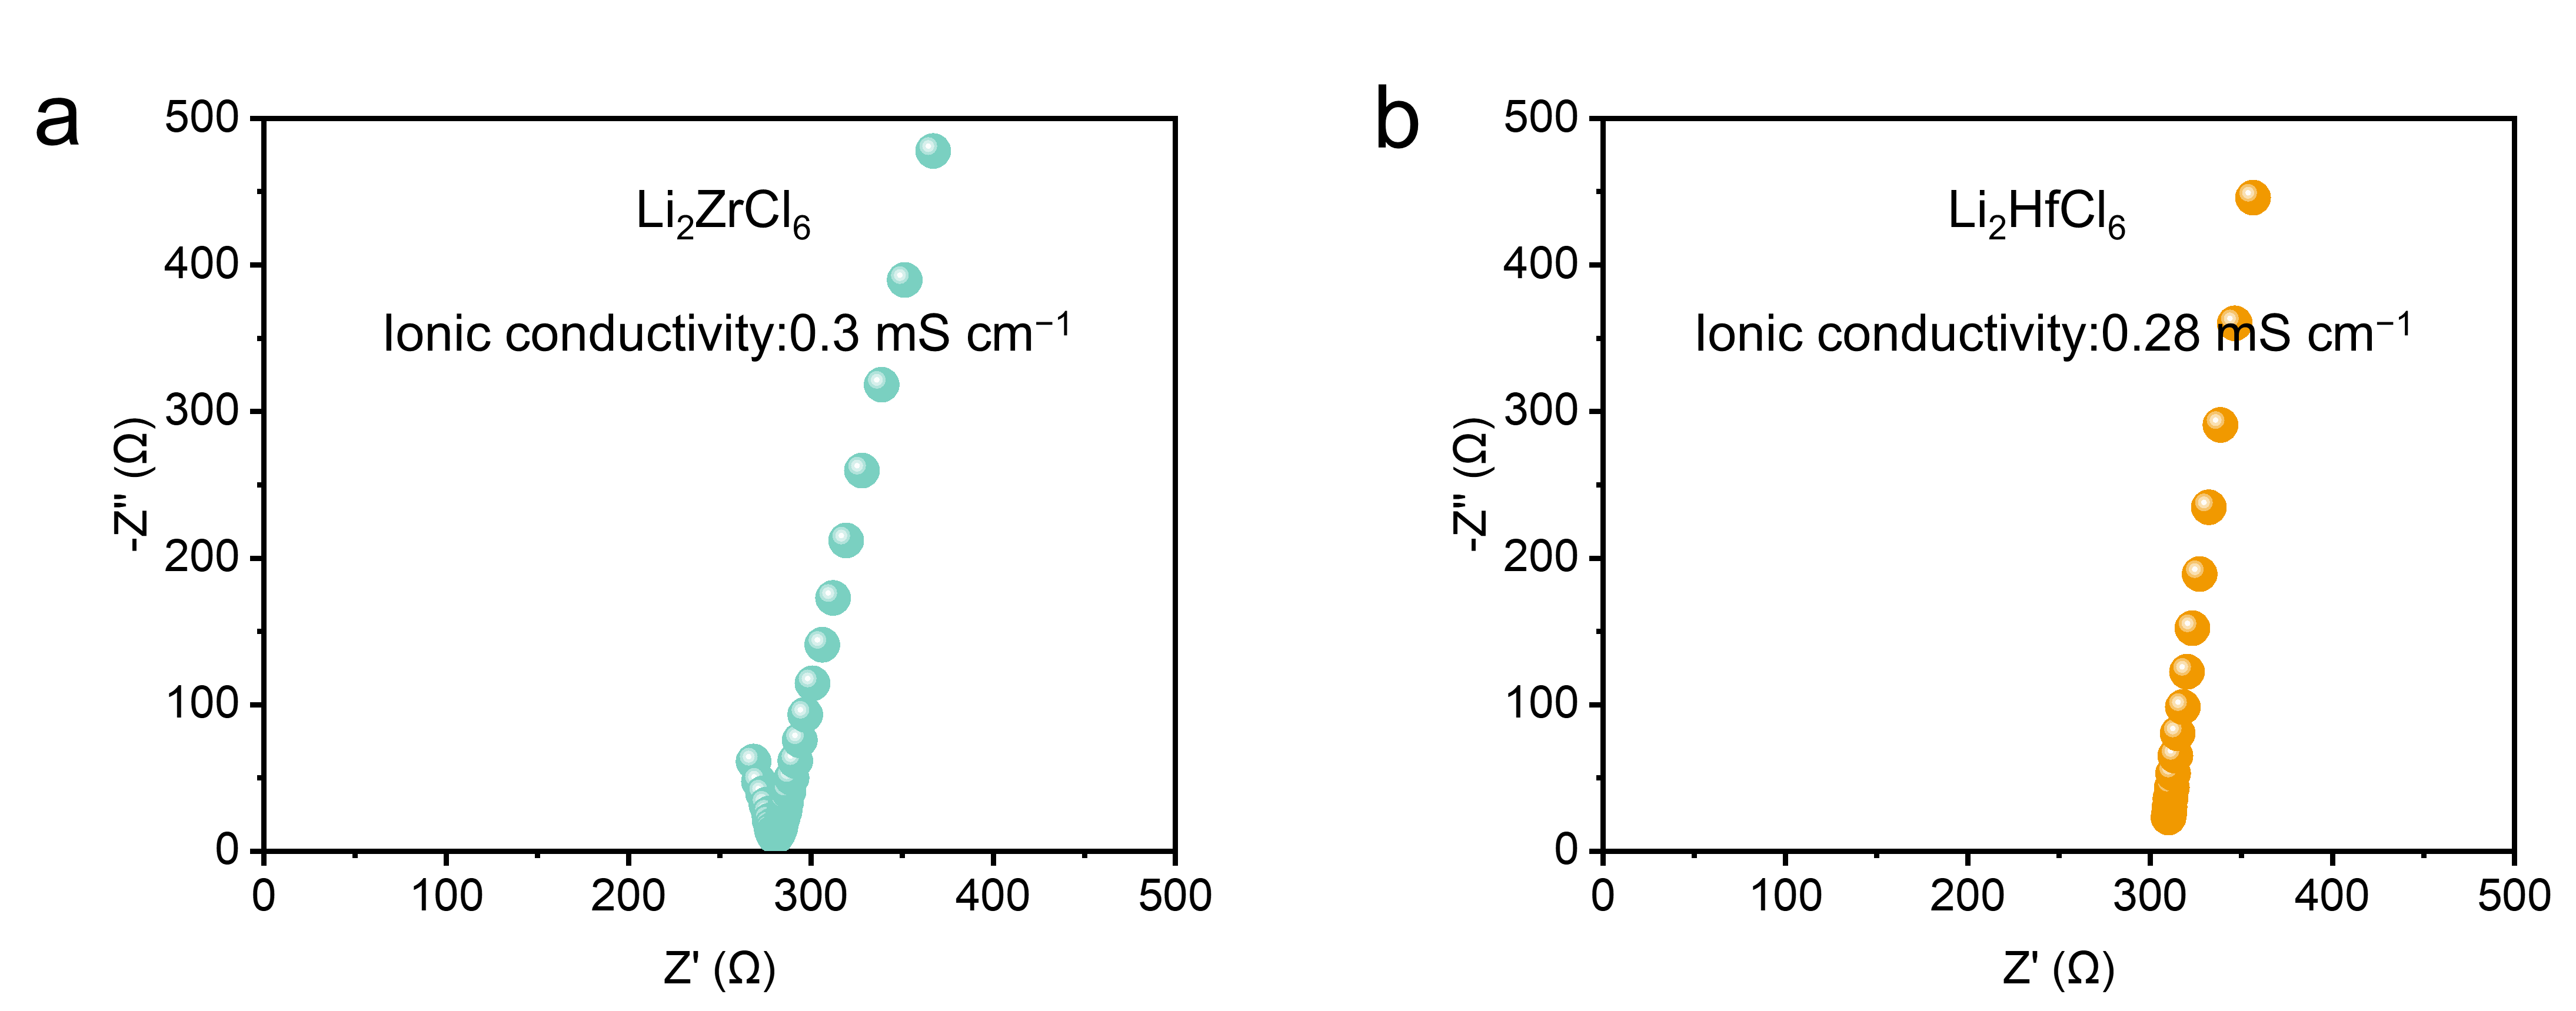


**Supplementary Fig. 12** Normalized Nyquist plots for the Li2ZrCl6 (**a**), and Li2HfCl6 (**b**) cold-pressed pellets.


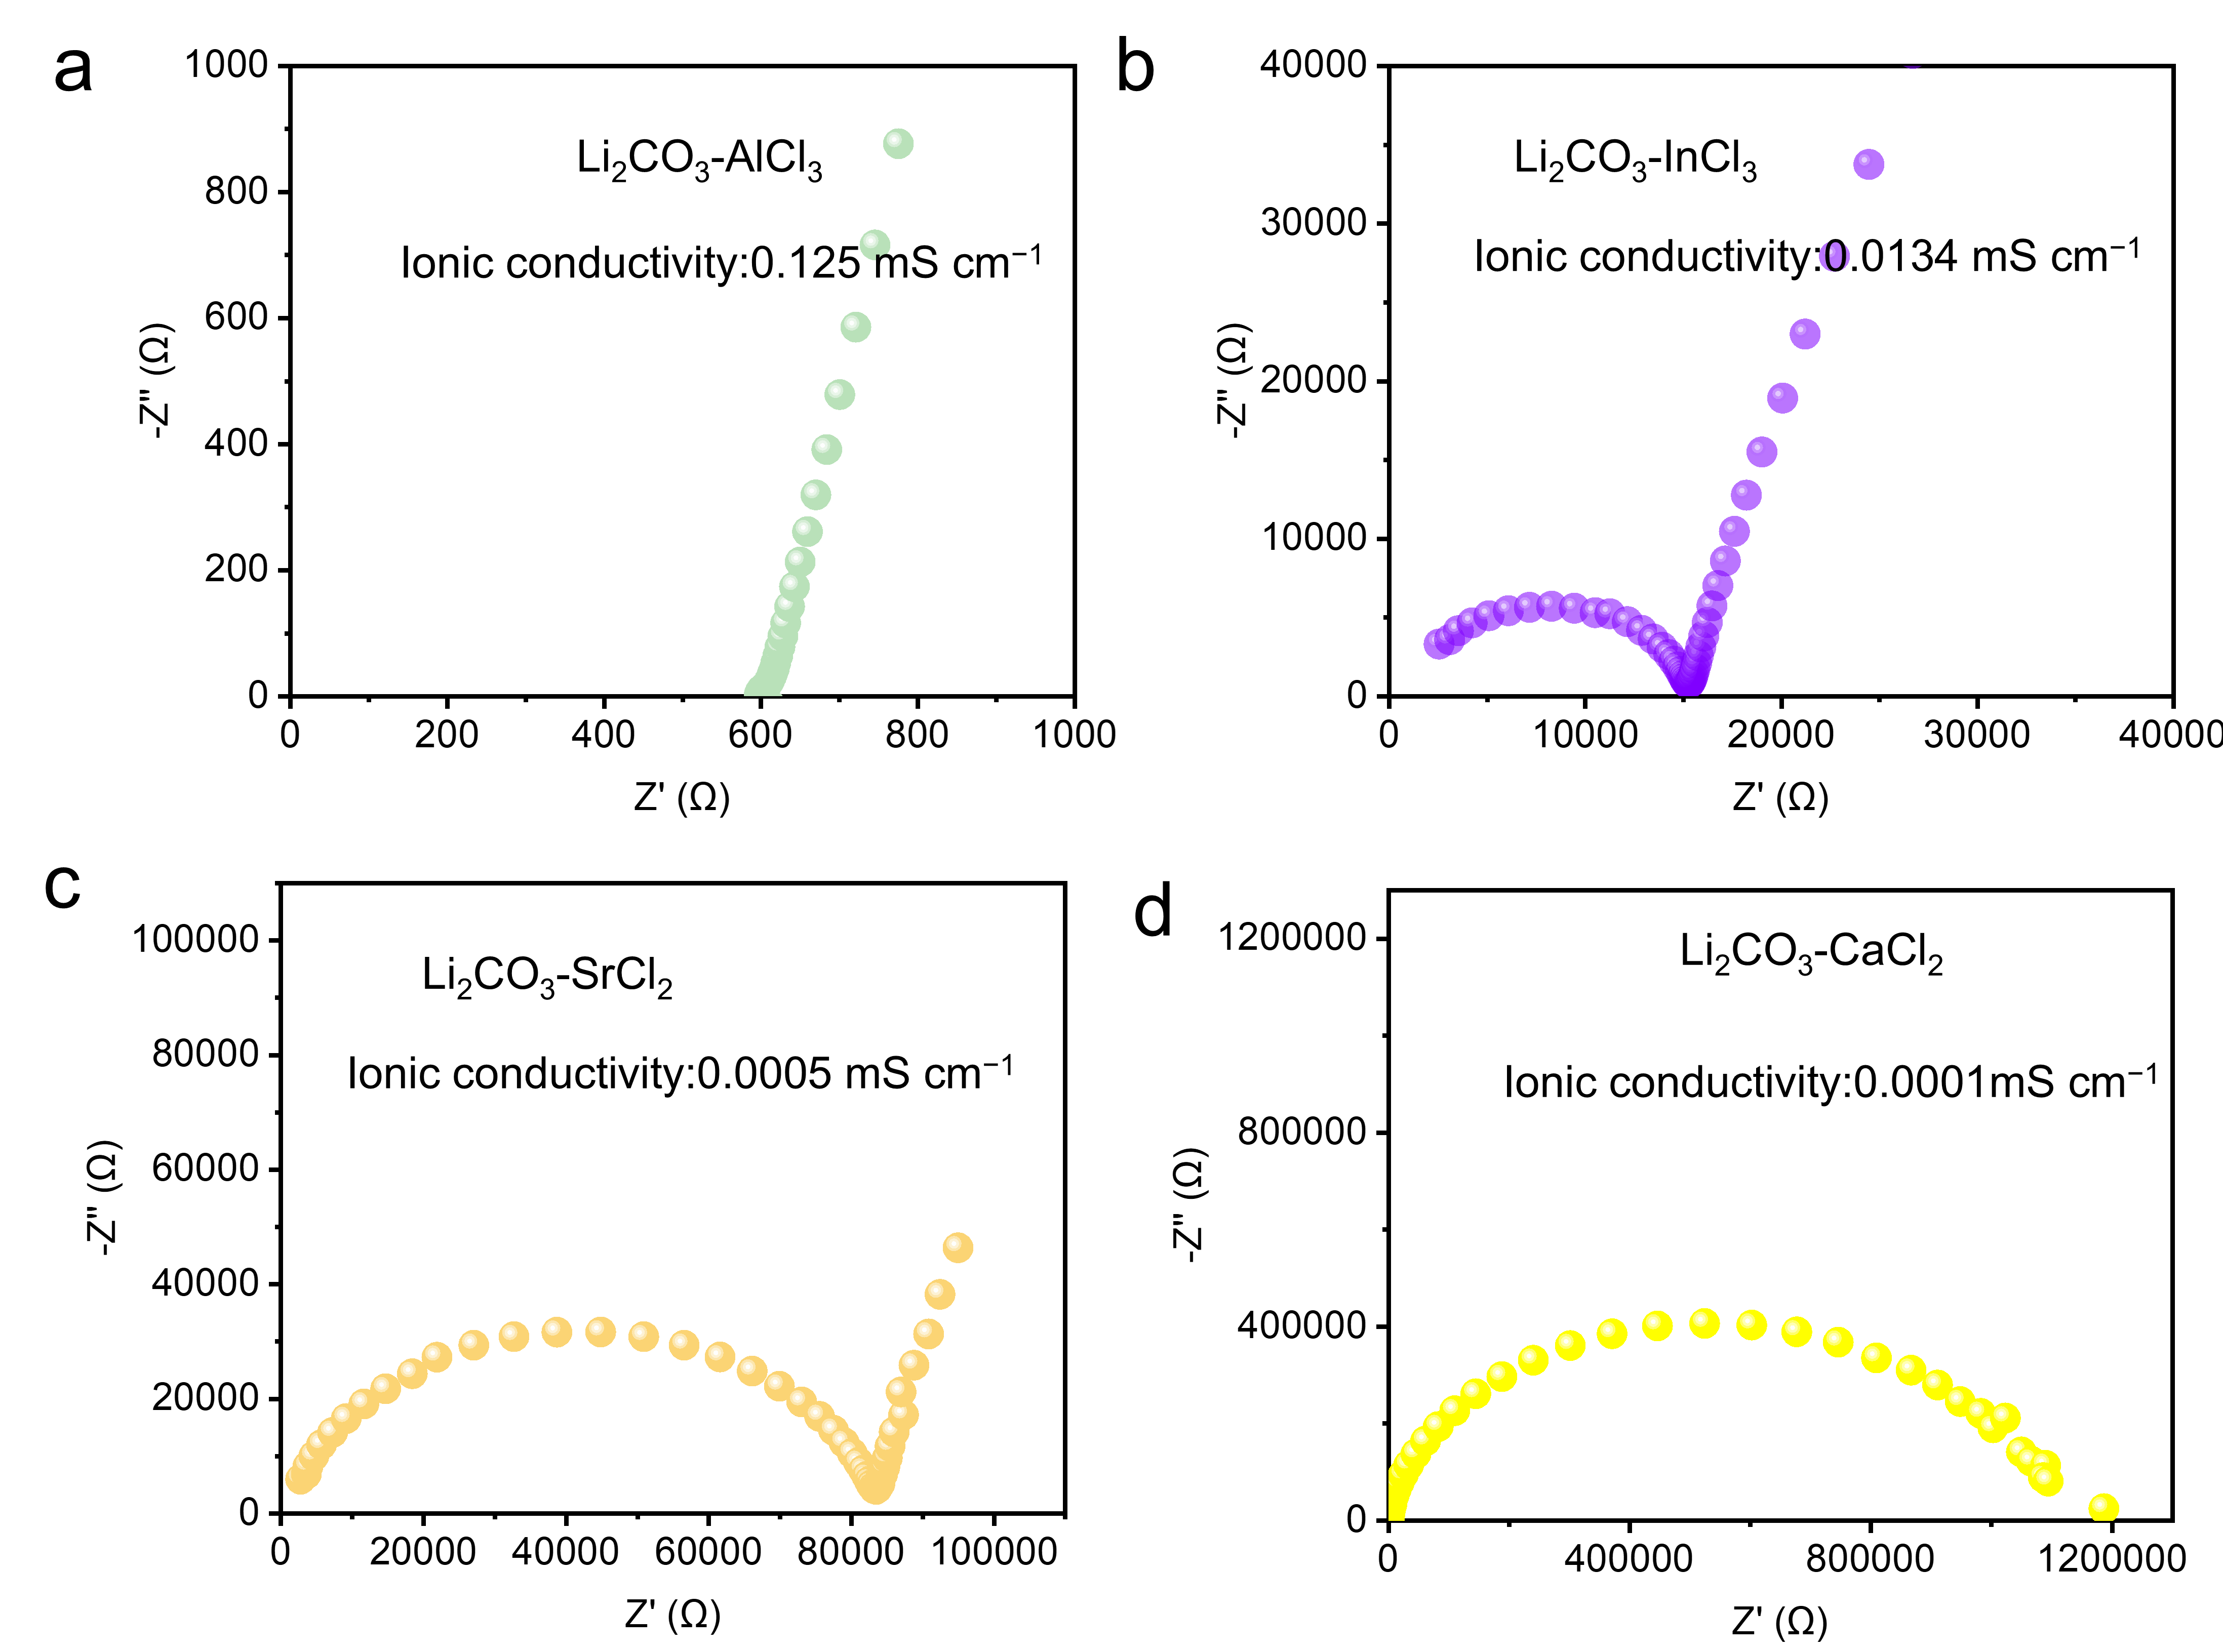


**Supplementary Fig. 13** Normalized Nyquist plots for the Li2CO3-AlCl3 (**a**), Li2CO3-InCl3 (**b**), Li2CO3-SrCl2 (**c**), and Li2CO3-CaCl2 (**d**) cold-pressed pellets.


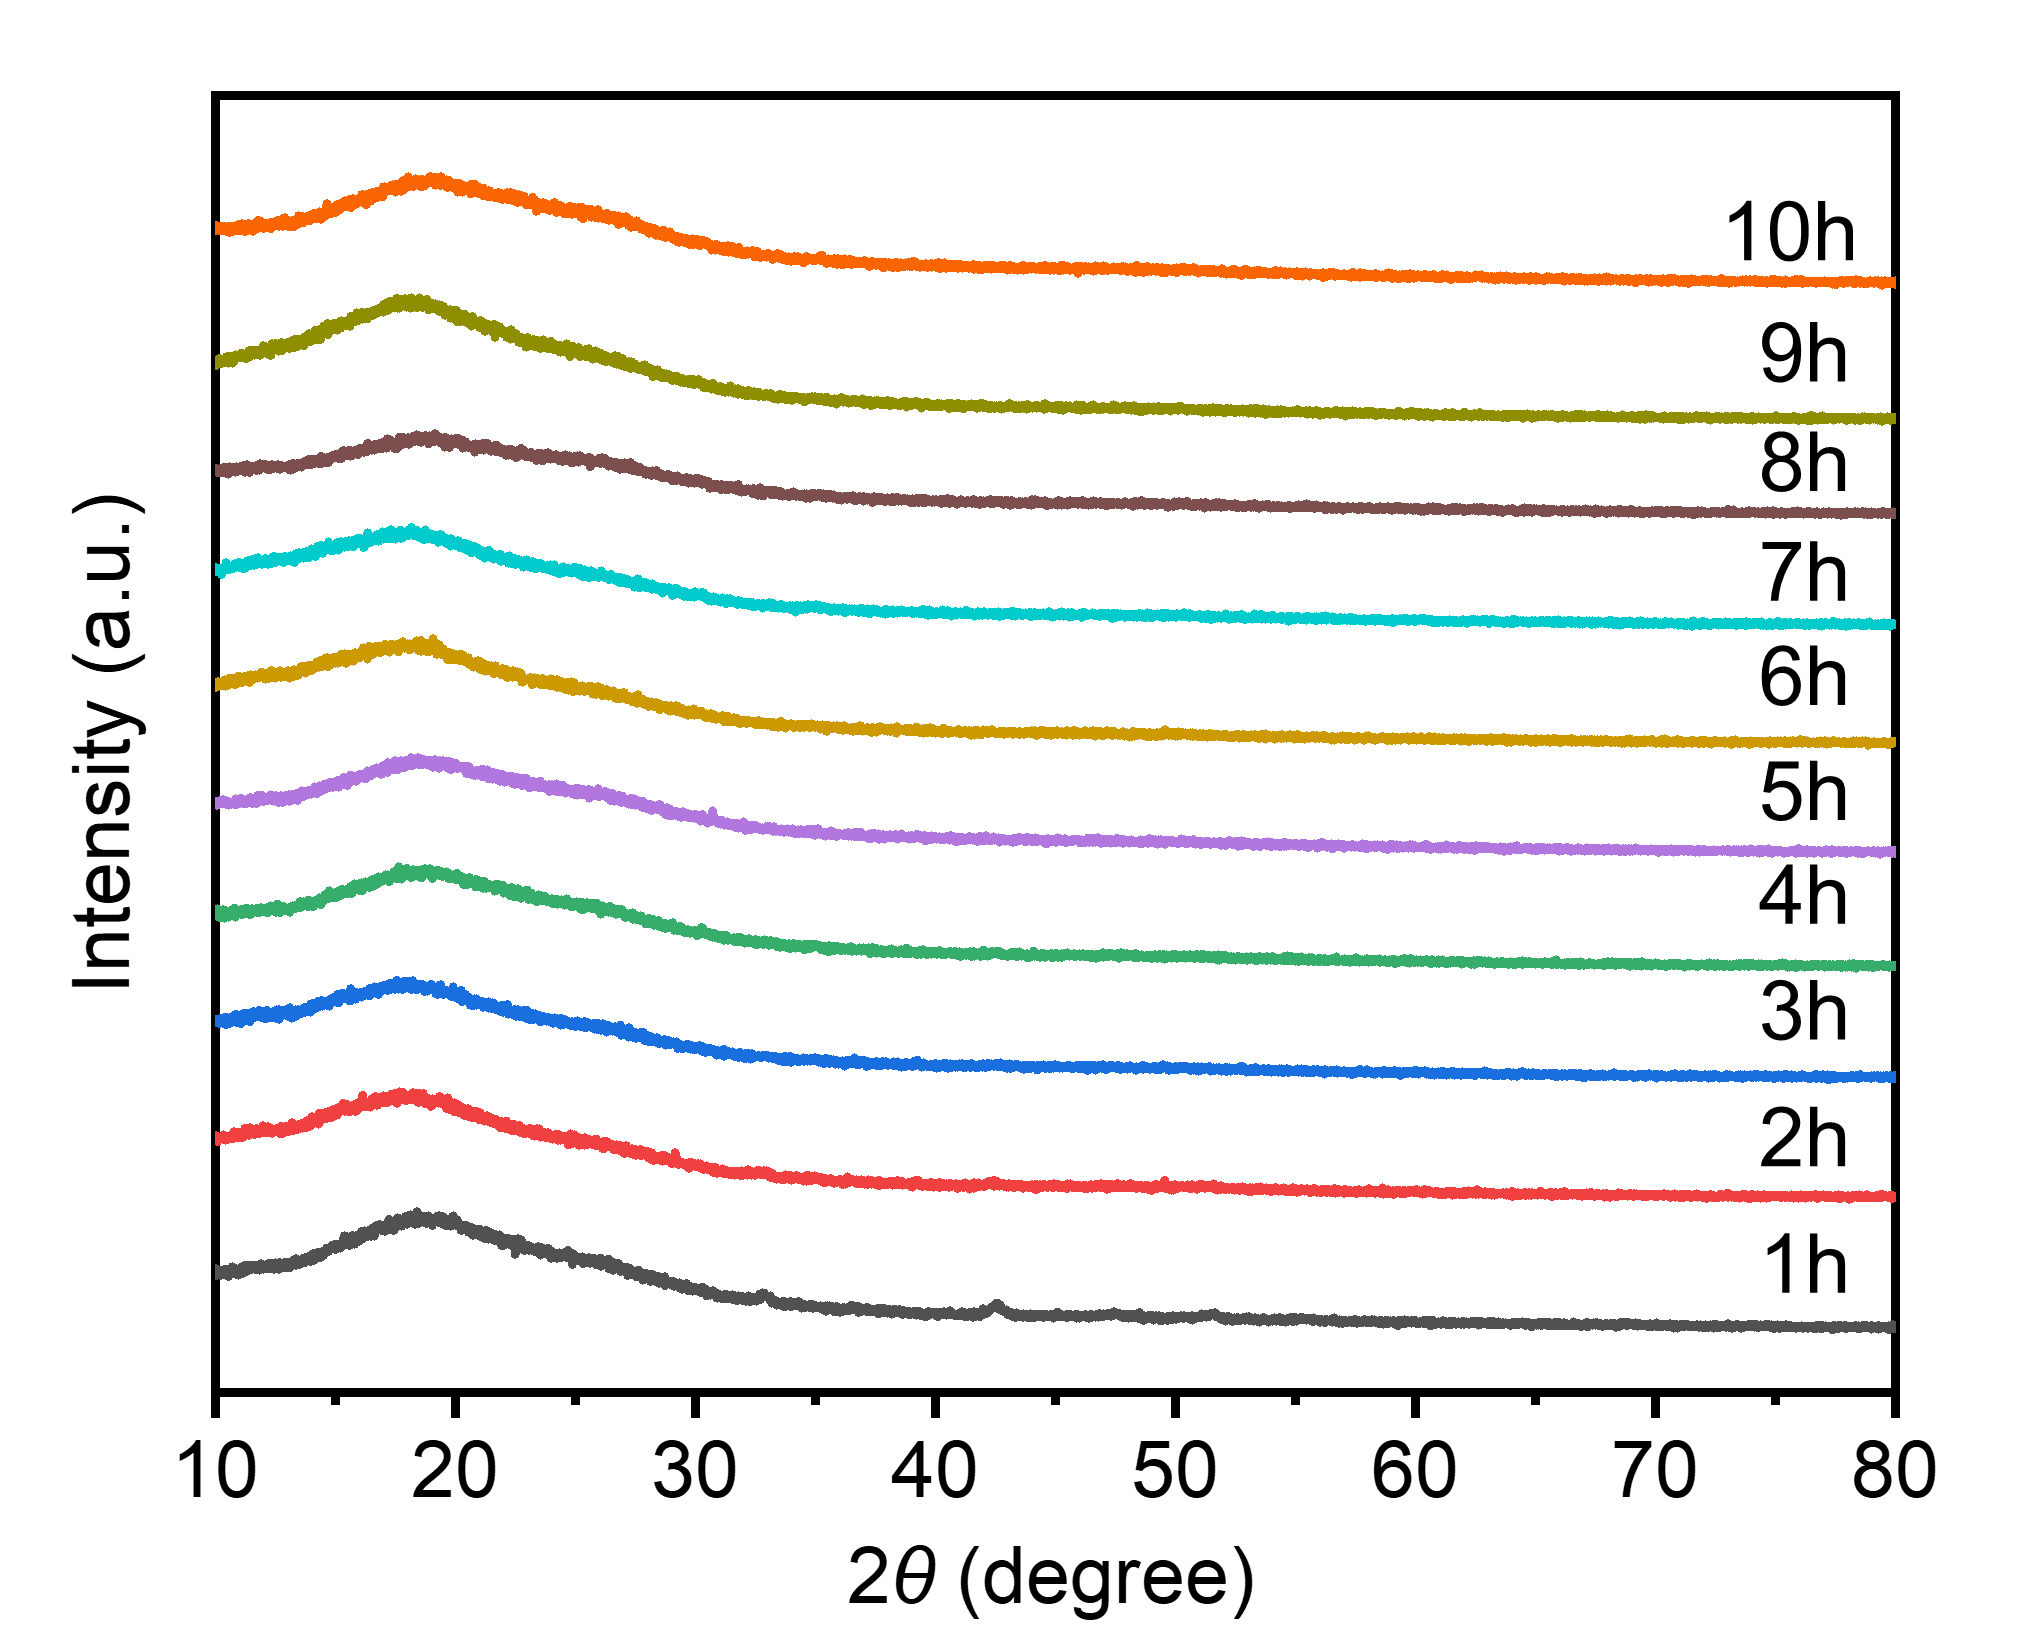


**Supplementary Fig. 14** Lab-based XRD patterns for LTCCO under different ball-milling durations. The large peak between 10-22°is the diffraction peak of the Kapton film used to seal the tested powders to avoid any air exposure.


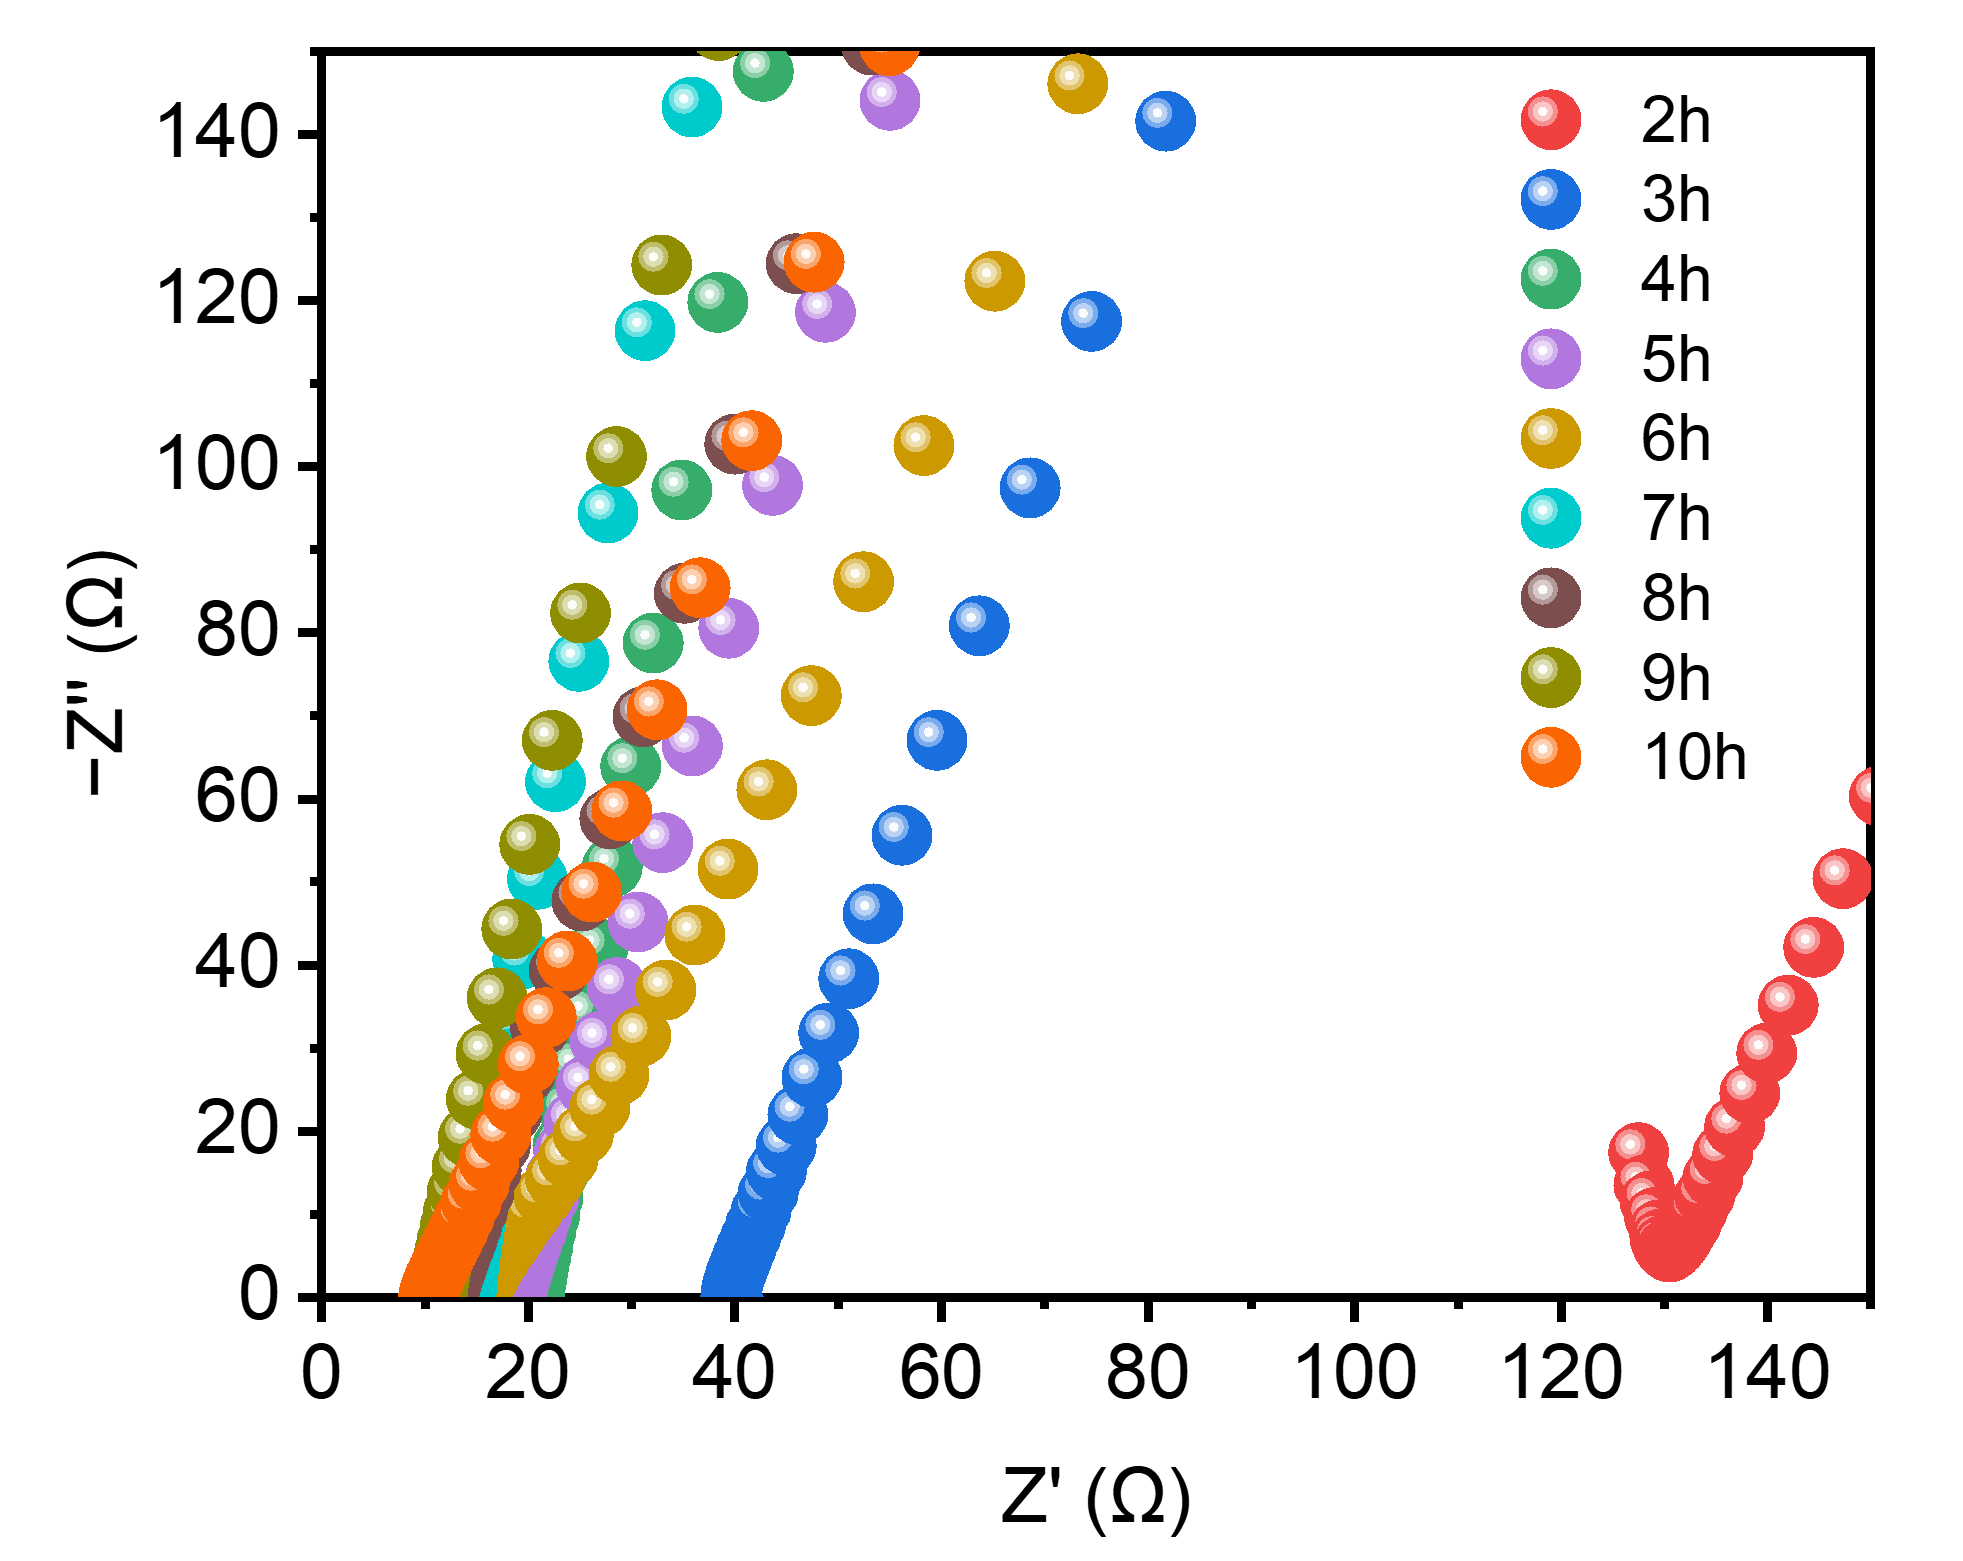


**Supplementary Fig. 15** Normalized Nyquist plots for the LTCCO cold-pressed pellets under different ball-milling durations.


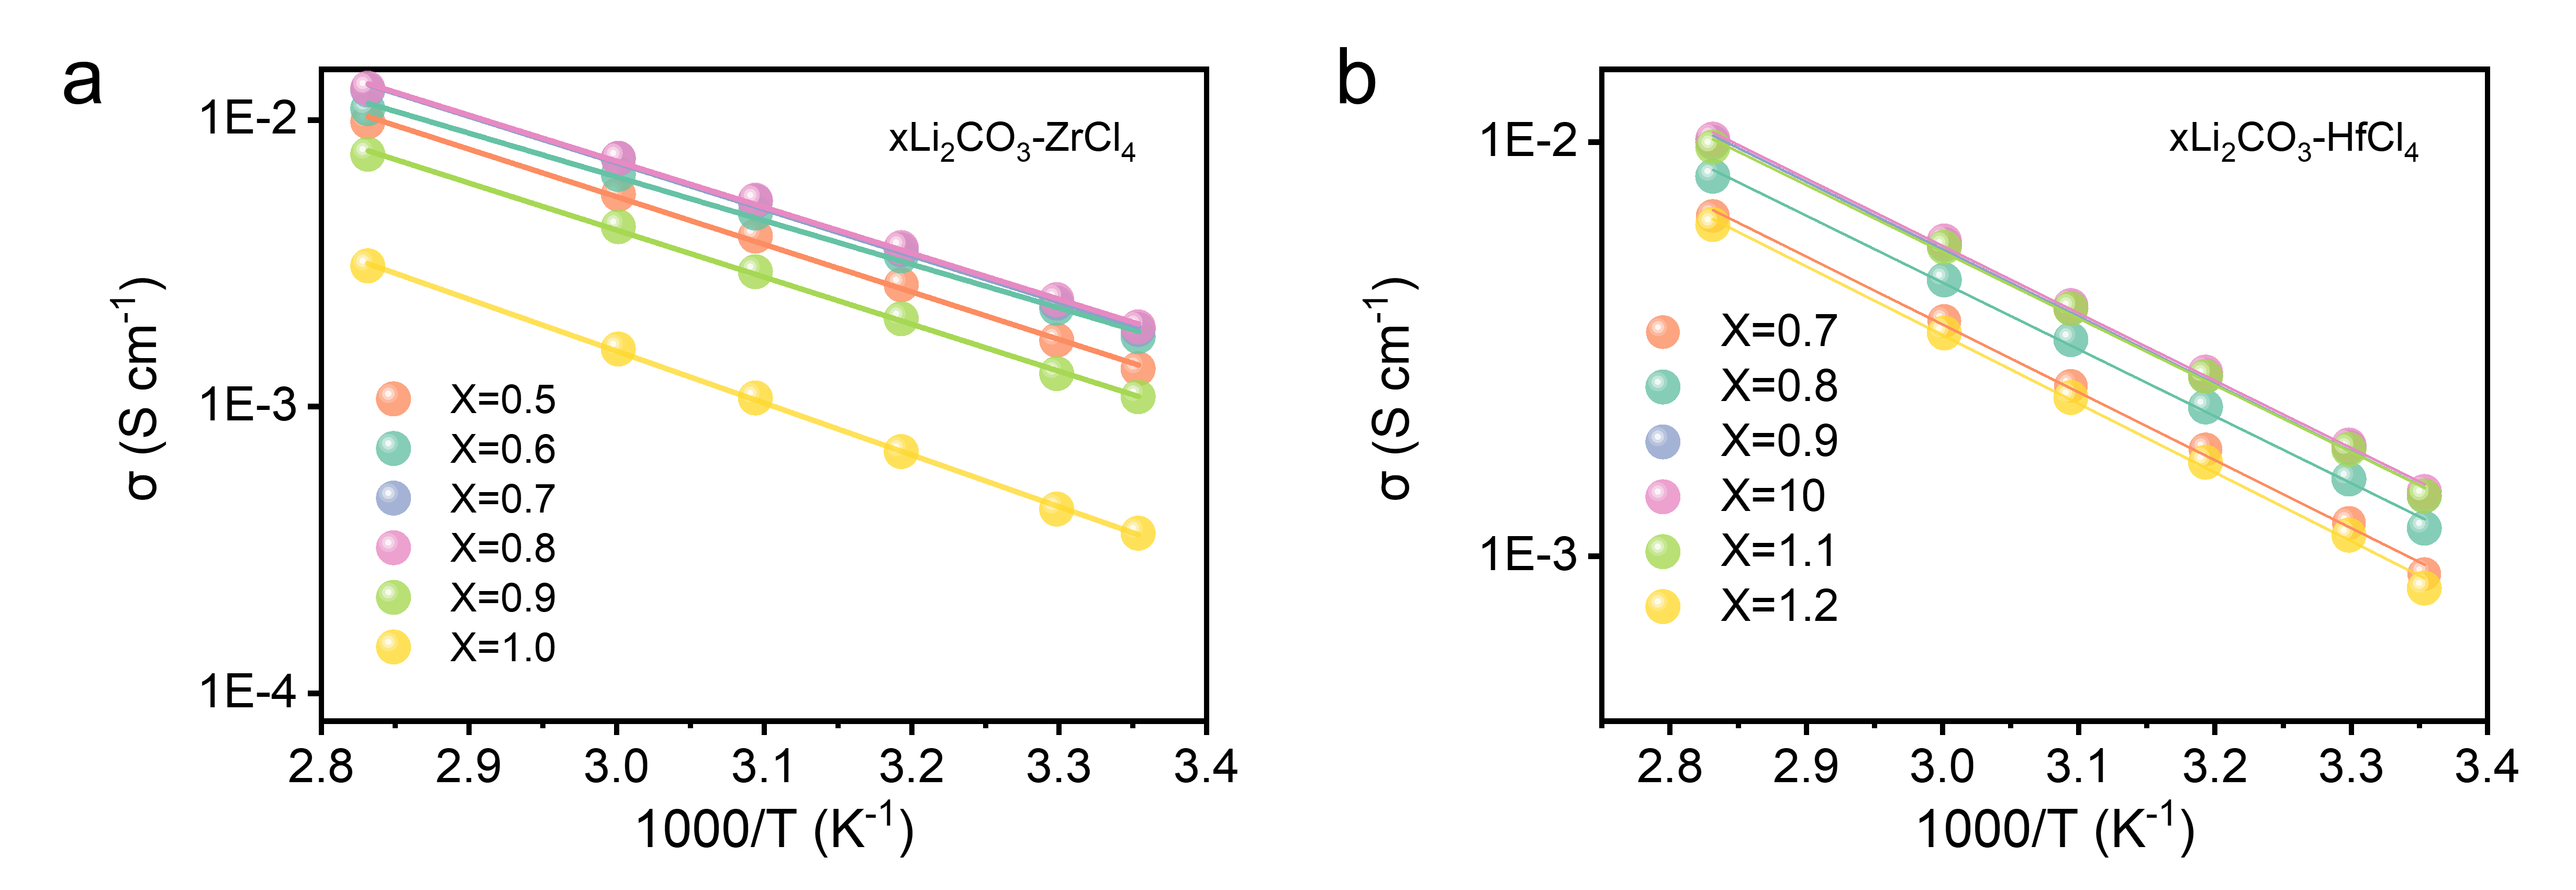


**Supplementary Fig. 16** Arrhenius plots for *x*Li2CO3-ZrCl4 (**a**), and xLi2CO3-HfCl4(**b**) SEs.


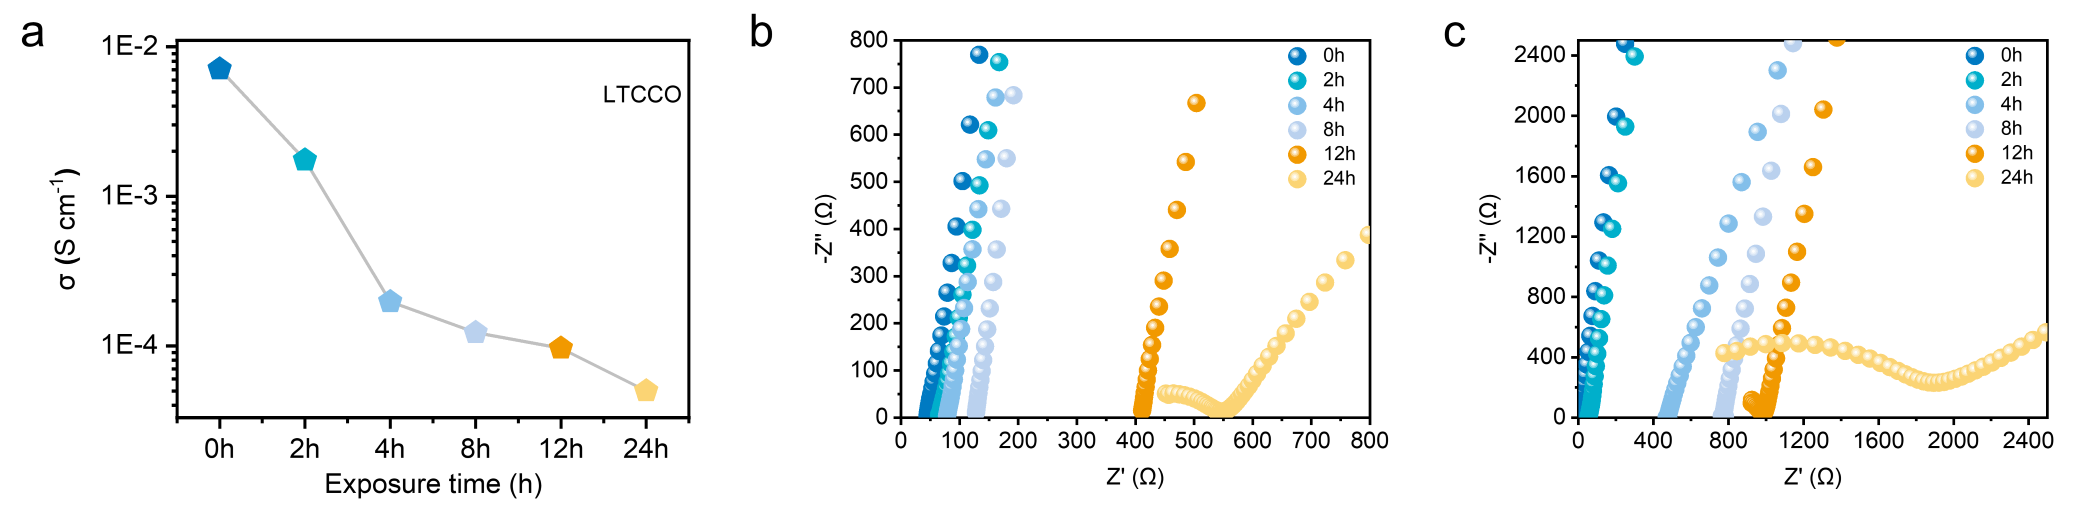

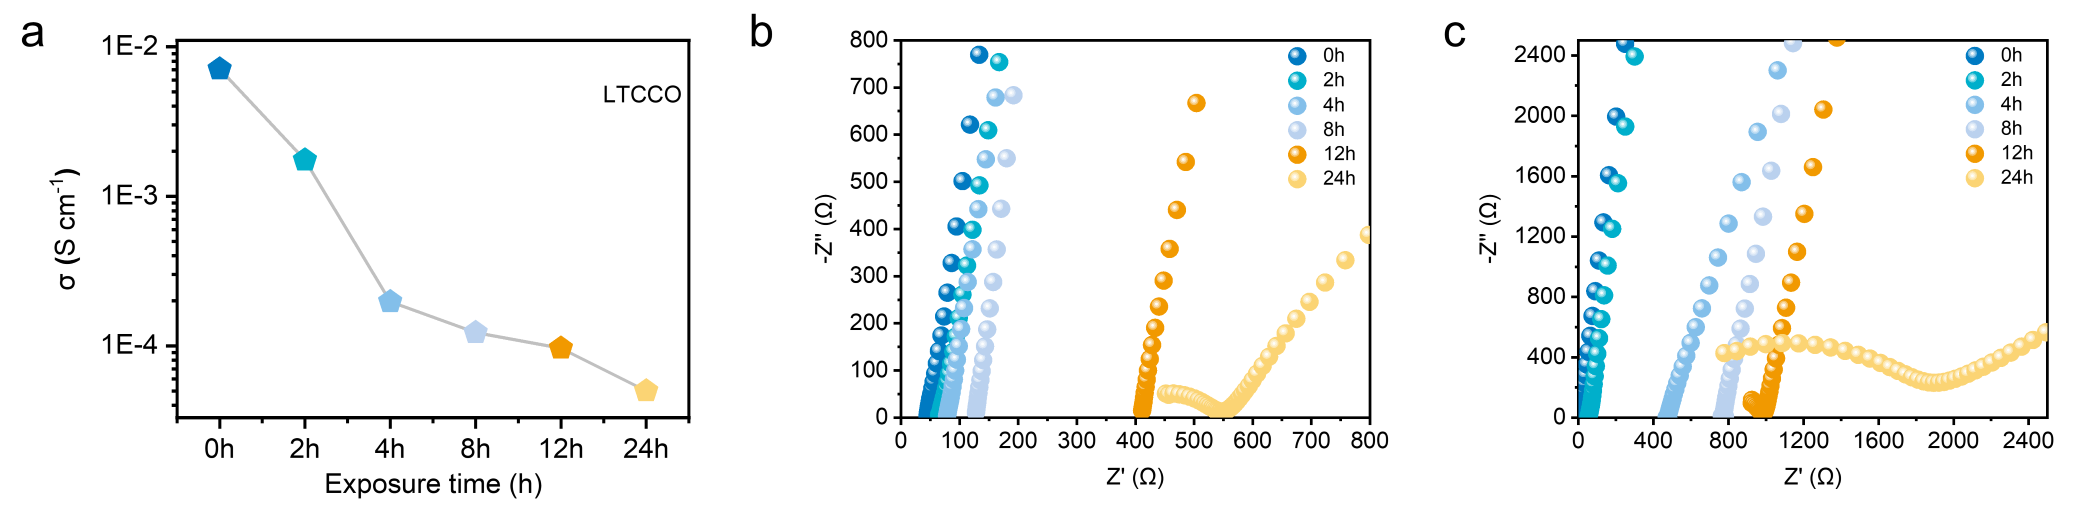


**Supplementary Fig. 17** The variation of ionic conductivity of LTCCO(**a**), and normalized Nyquist plots for the LTCCO(**b**) cold-pressed pellets at different exposure time.


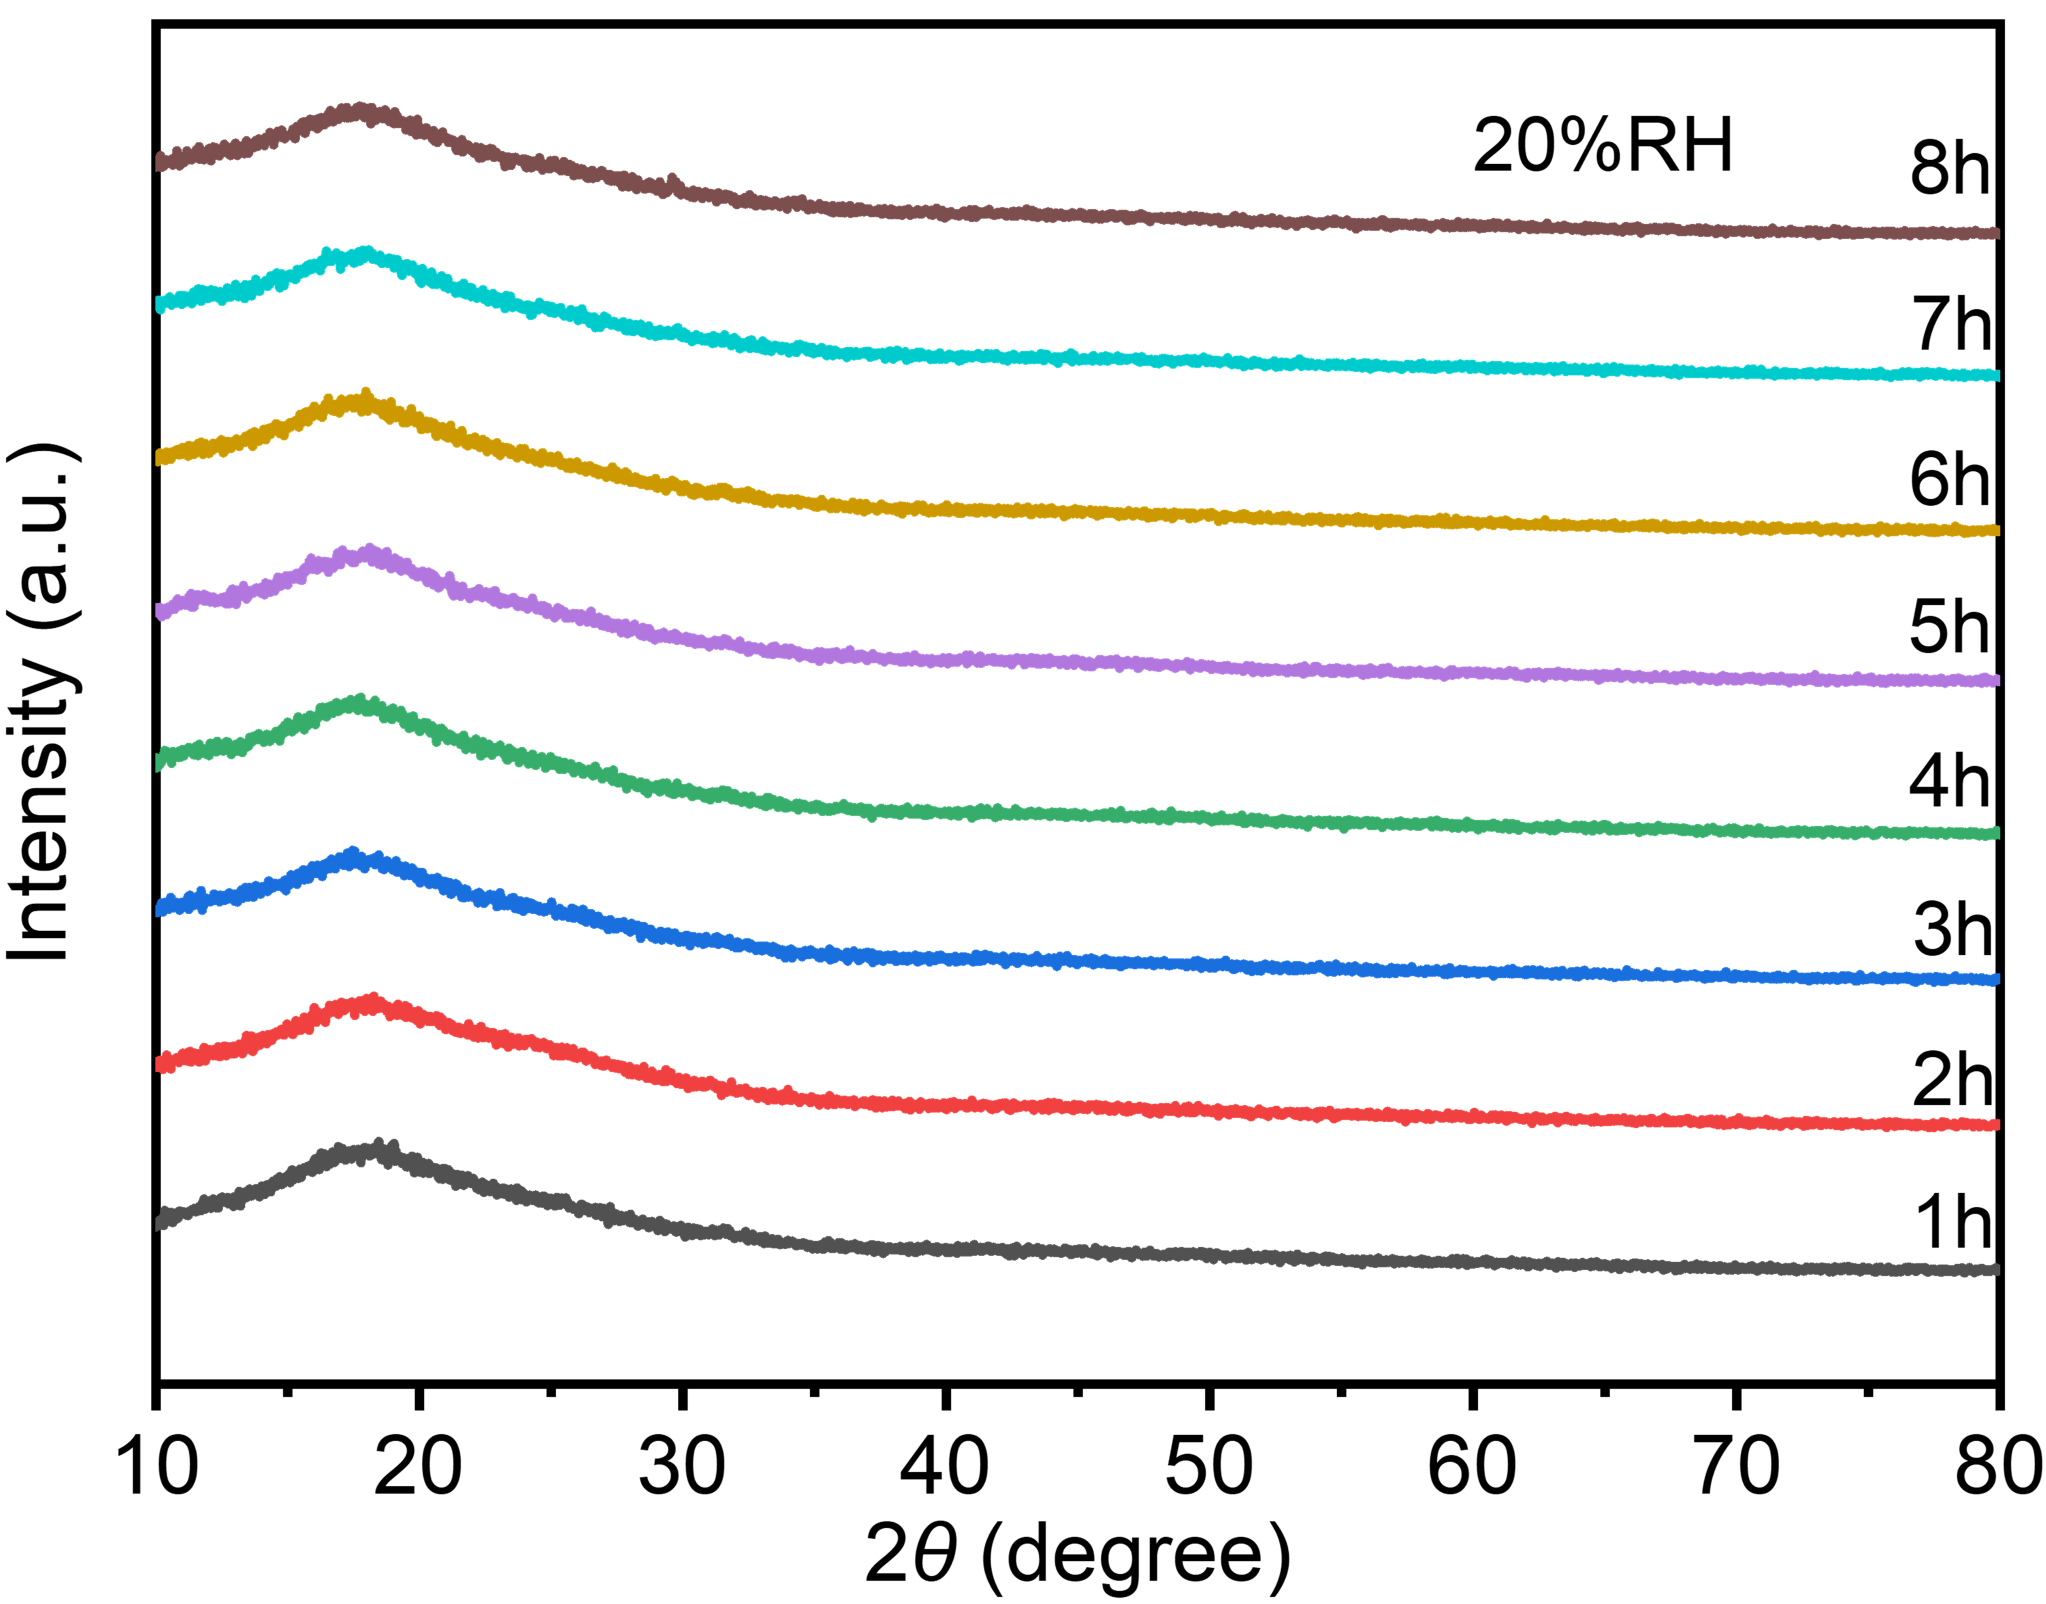


**Supplementary Fig. 18** The XRD patterns of LZCCO cold-pressed pellets exposed to air with 20% humidity for different periods of time.


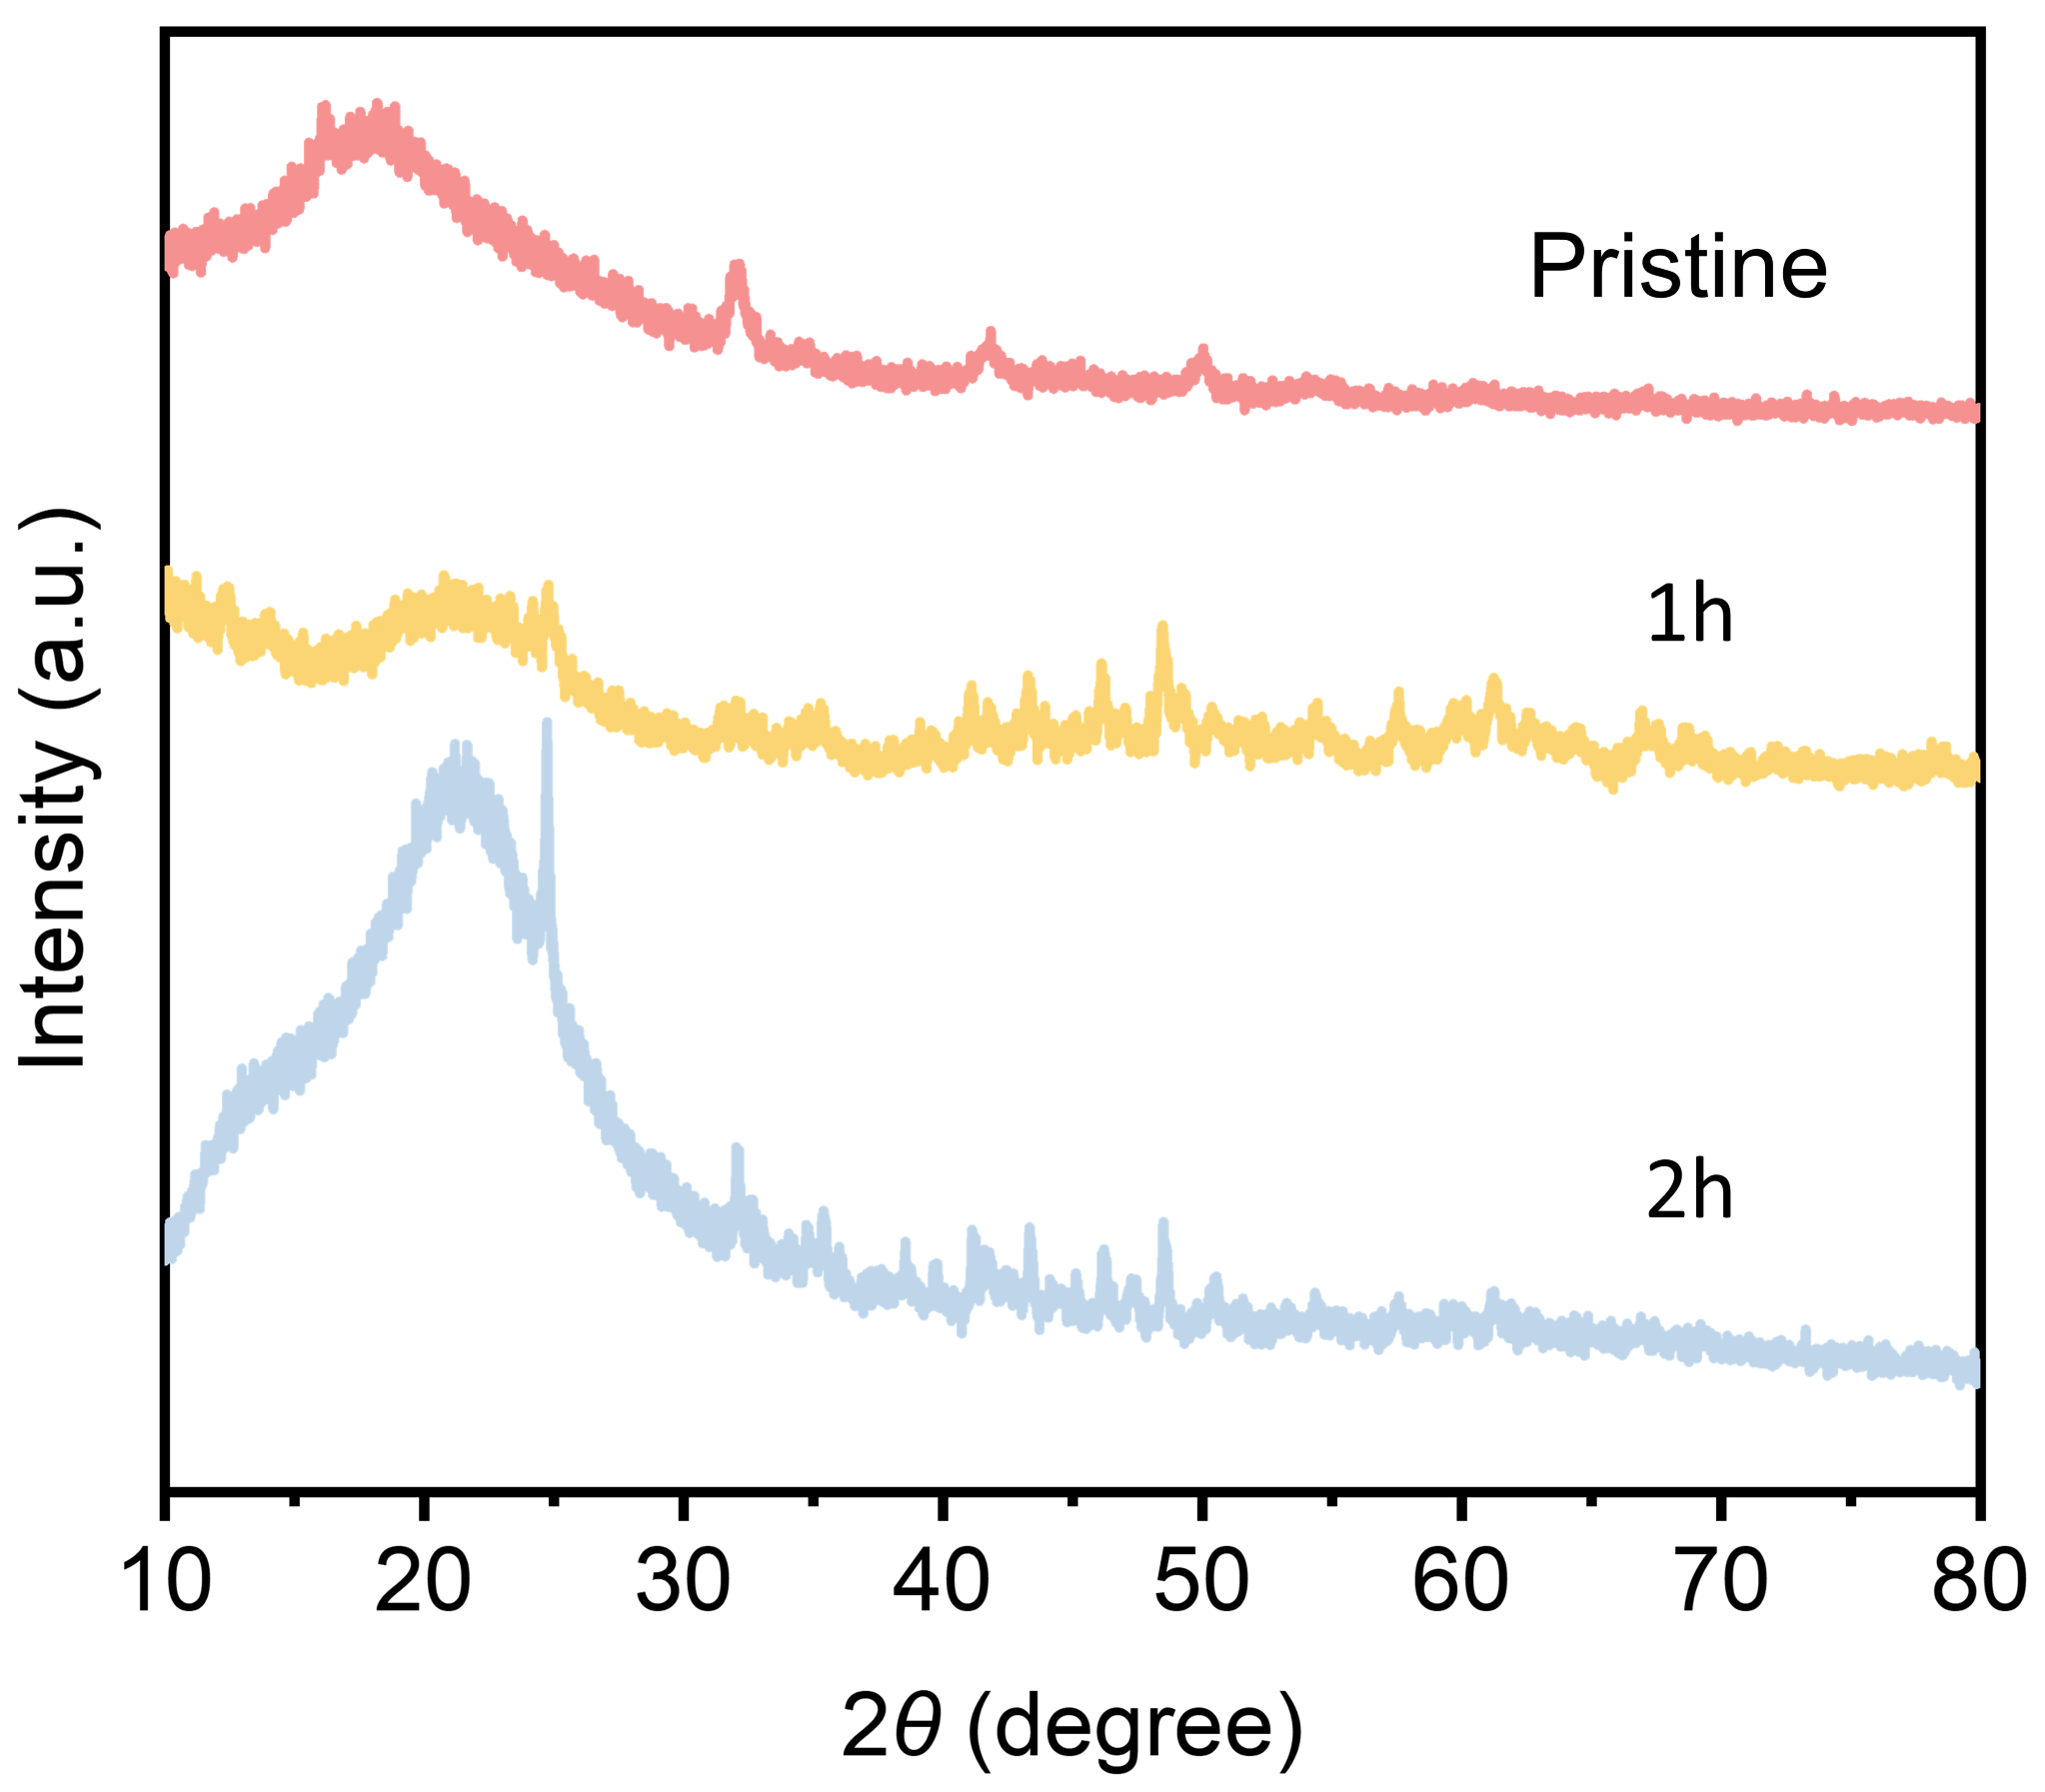


**Supplementary Fig. 19** The XRD patterns and sample images of LZC cold-pressed pellets exposed to air with 20% humidity for different periods of time.


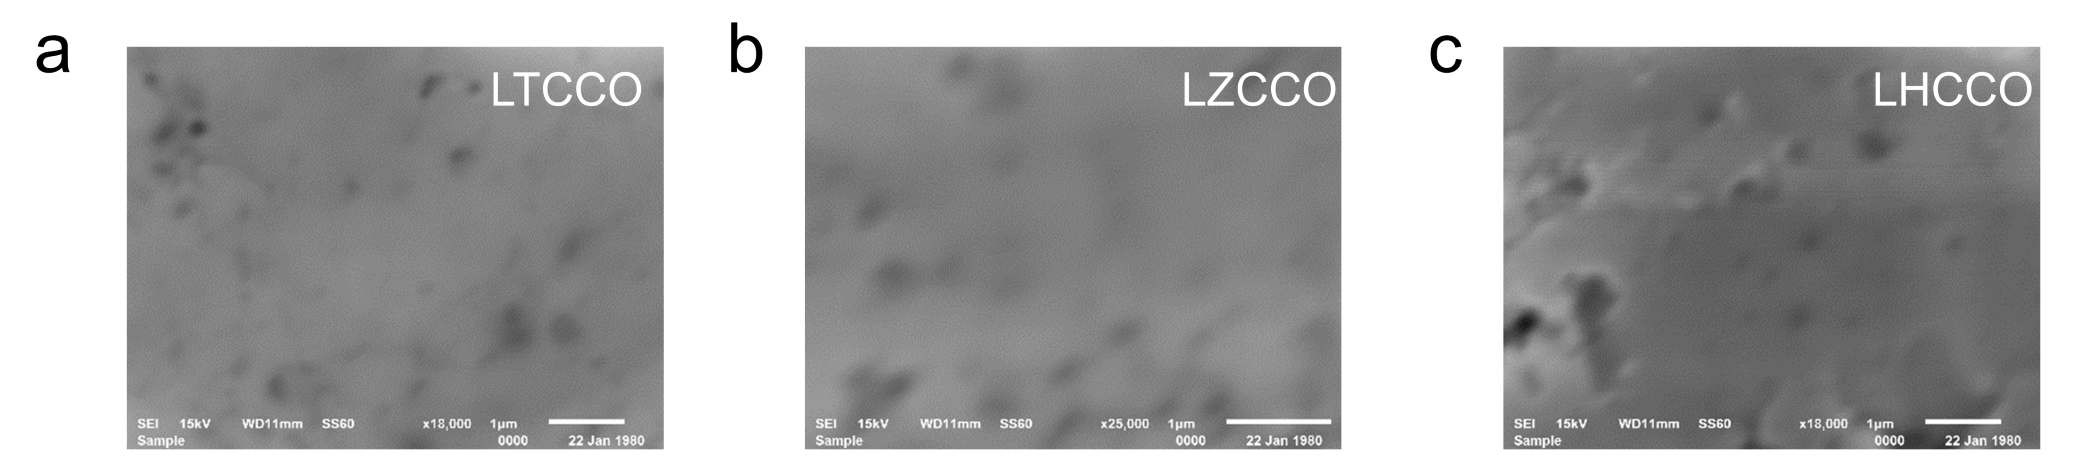


**Supplementary Fig. 20** Scanning electron microscope (SEM) images of the LTCCO(**a**), LZCCO (**b**), and LHCCO (**c**)cold-pressed pellets.


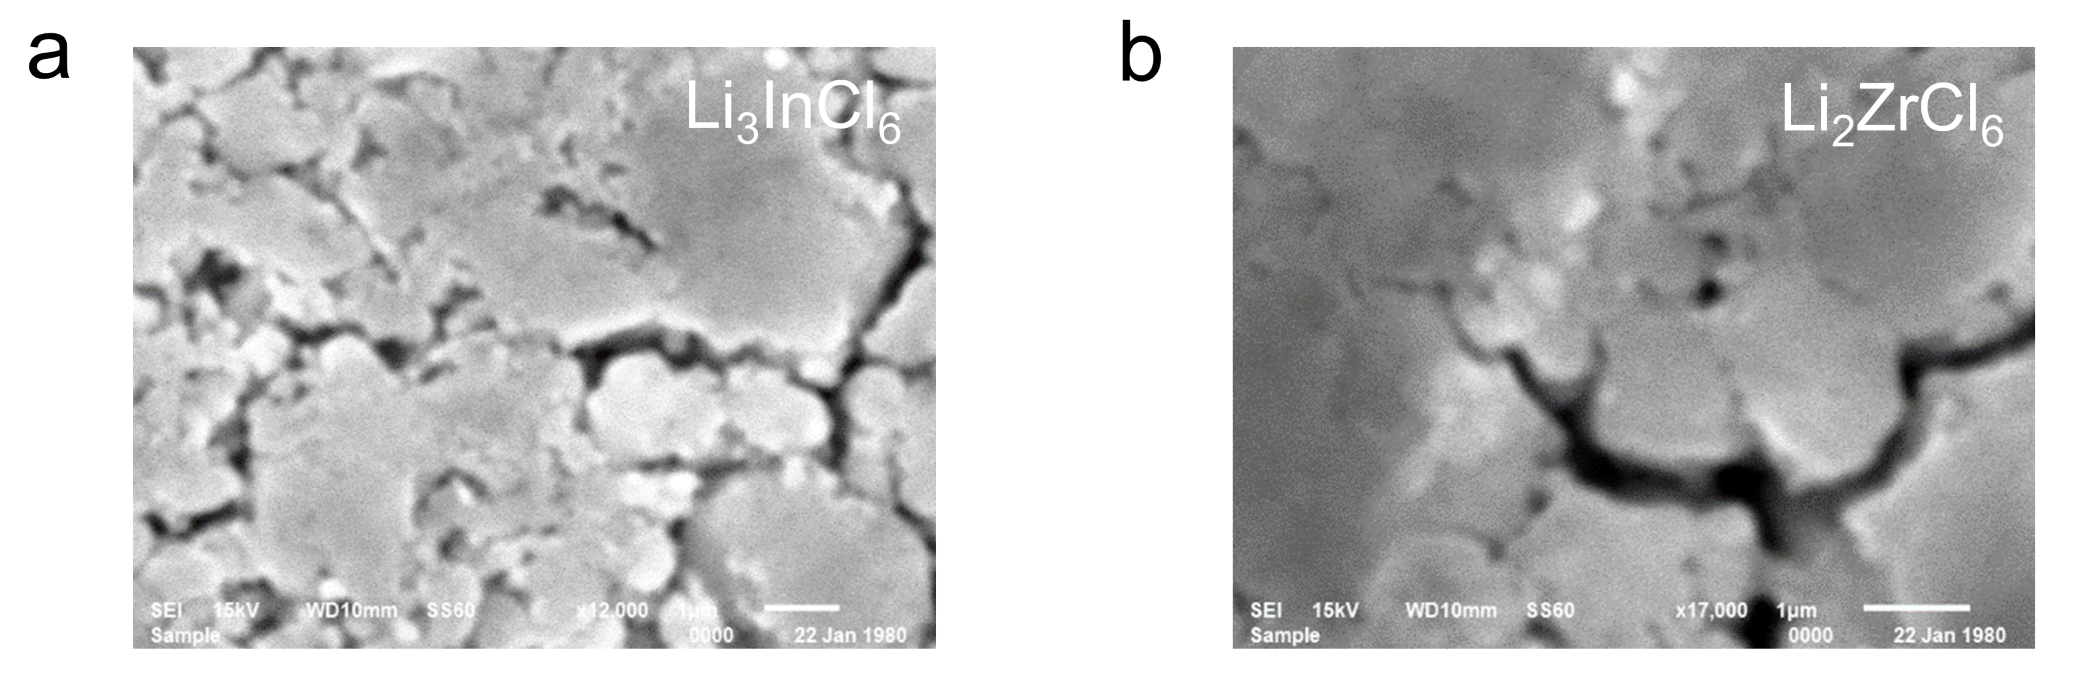


**Supplementary Fig. 21** Scanning electron microscope (SEM) images of the Li3InCl6(**a**), and Li2ZrCl6 (**b**) cold-pressed pellets.


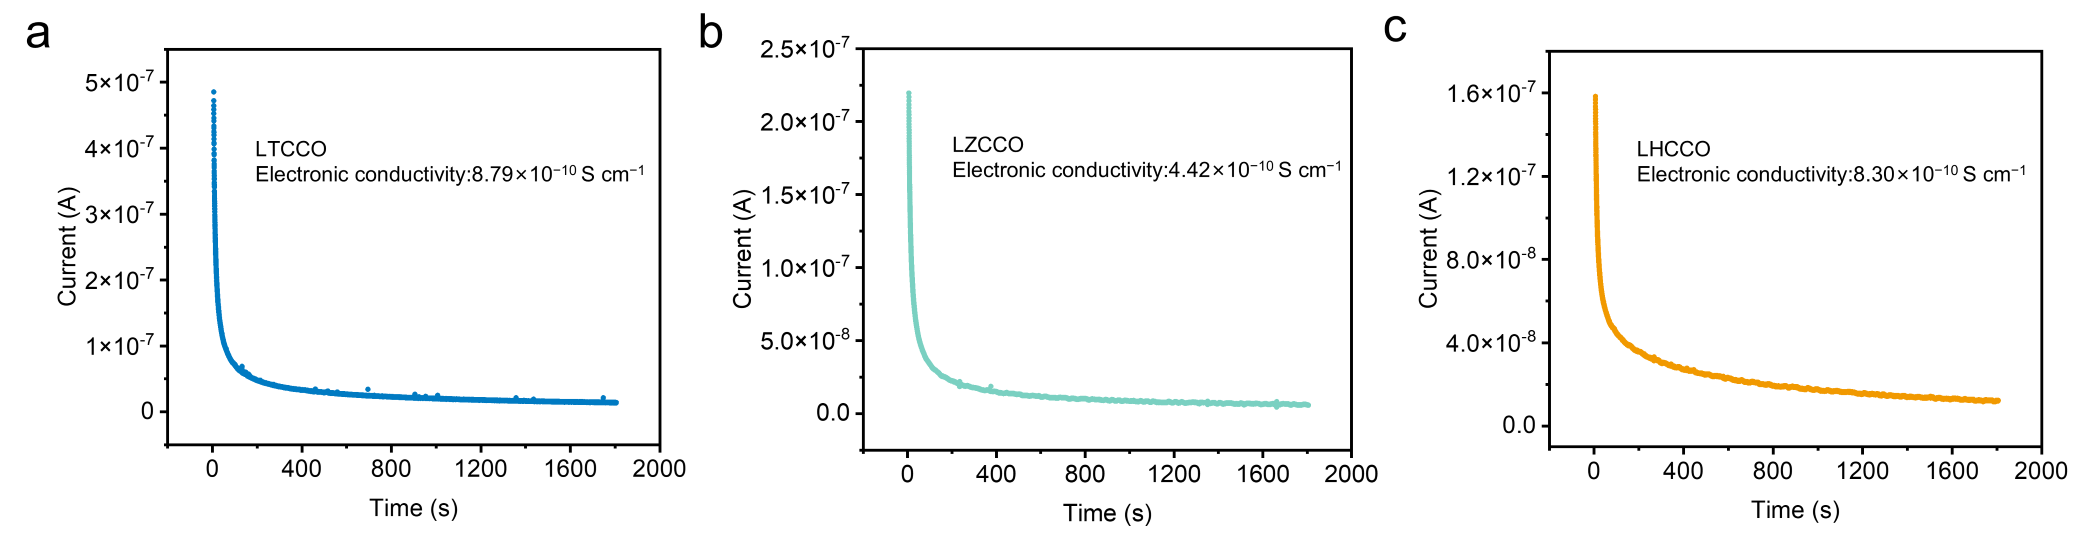


**Supplementary Fig. 22** Electronic conductivity of LTCCO (**a**), LZCCO (**b**), and LHCCO (**c**) determination by DC measurements at room temperature.


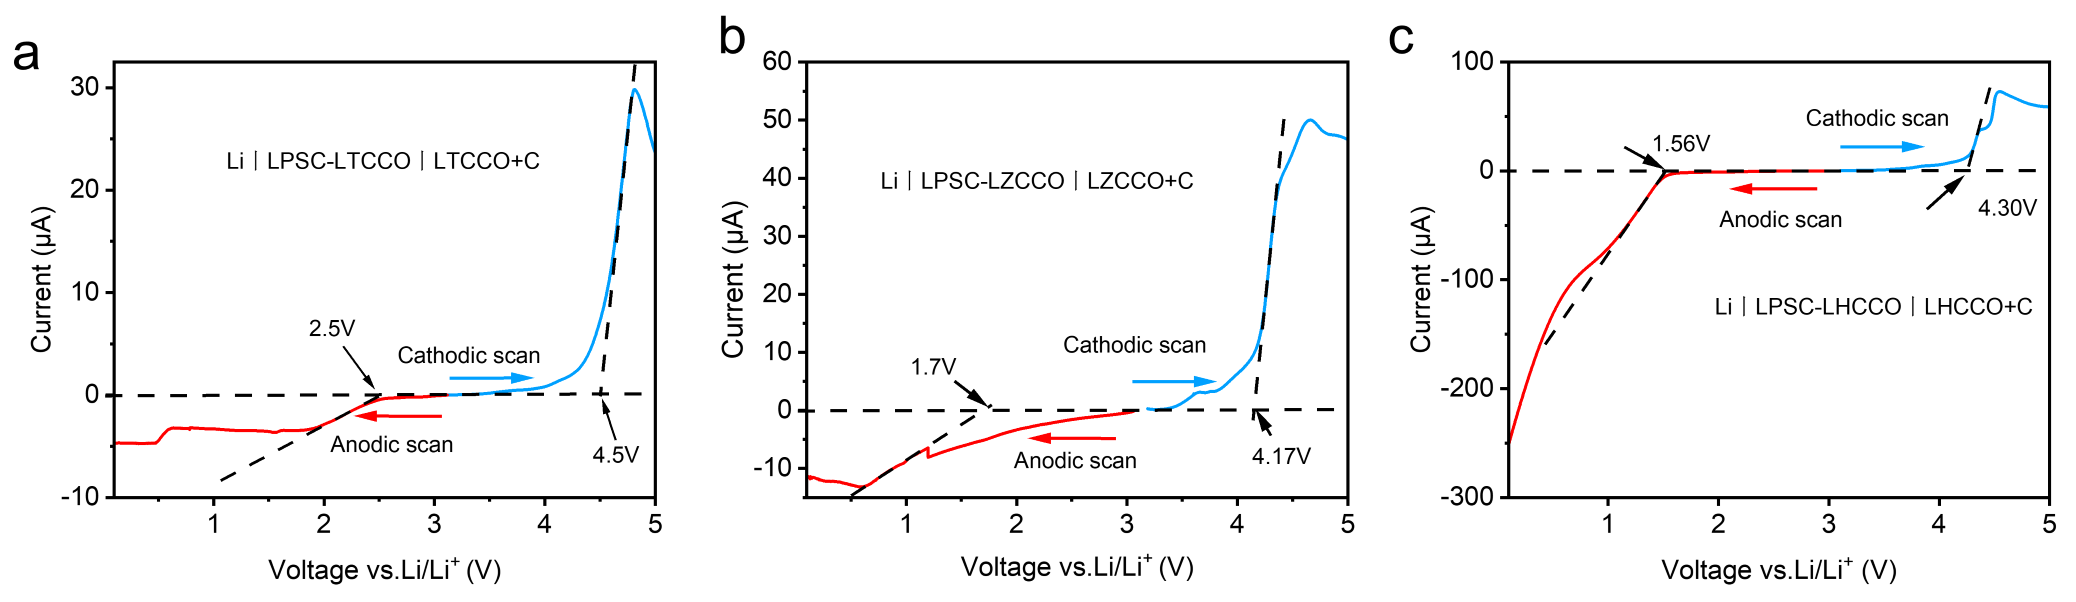


**Supplementary Fig. 23** Linear cyclic voltammetry (LSV) profiles of LTCCO (**a**), LZCCO (**b**), and LHCCO (**c**).


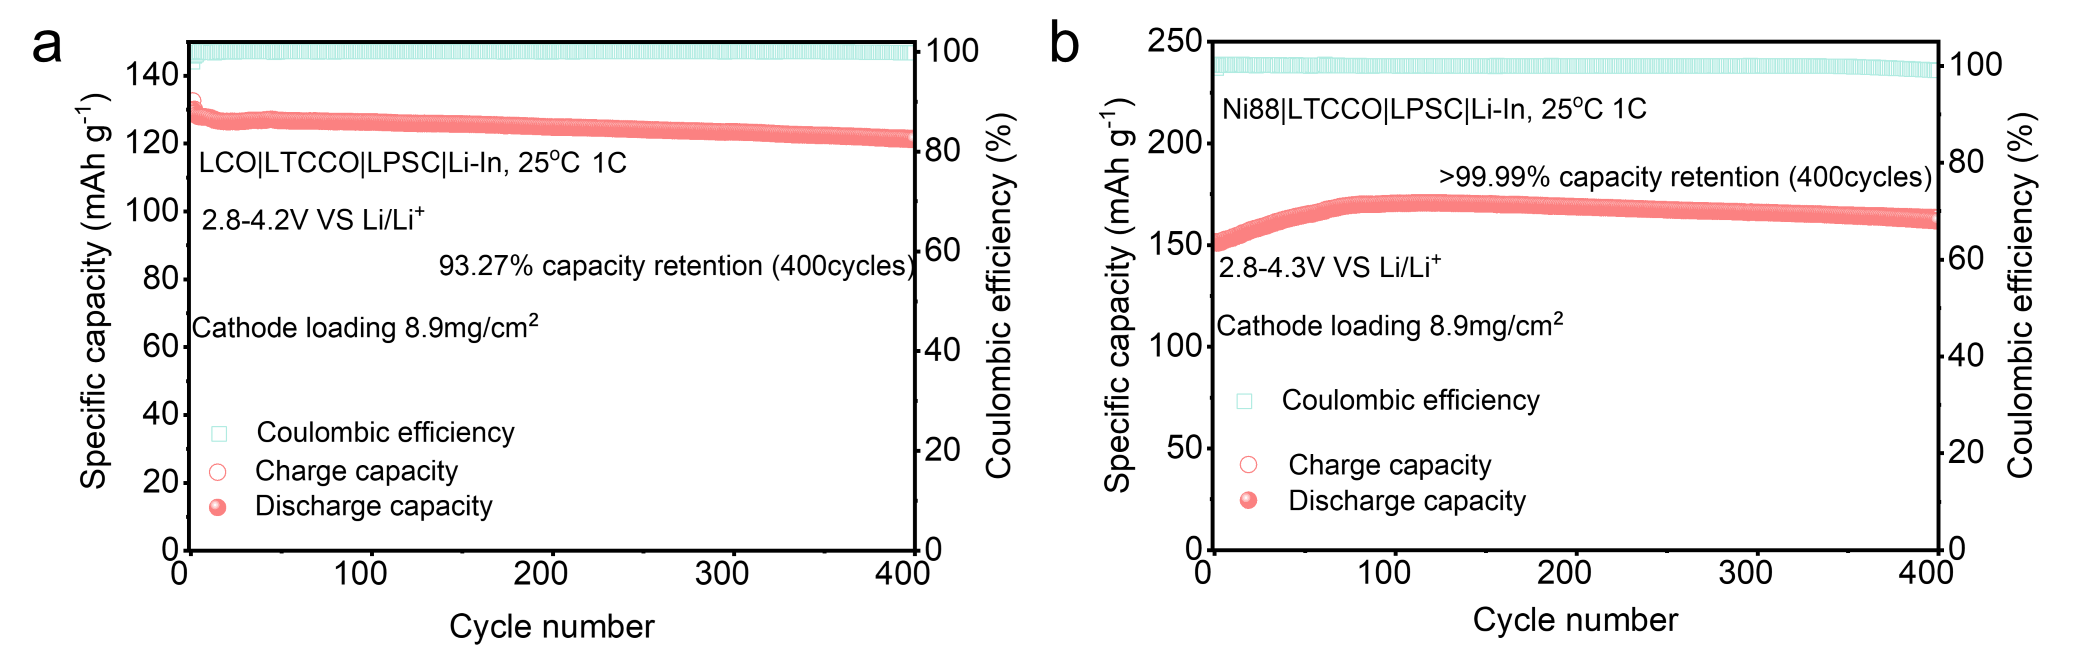


**Supplementary Fig. 24** Long cycle performance of LCO (**a**), and NCM88 (**b**) ASSBs using LTCCO at room temperature.


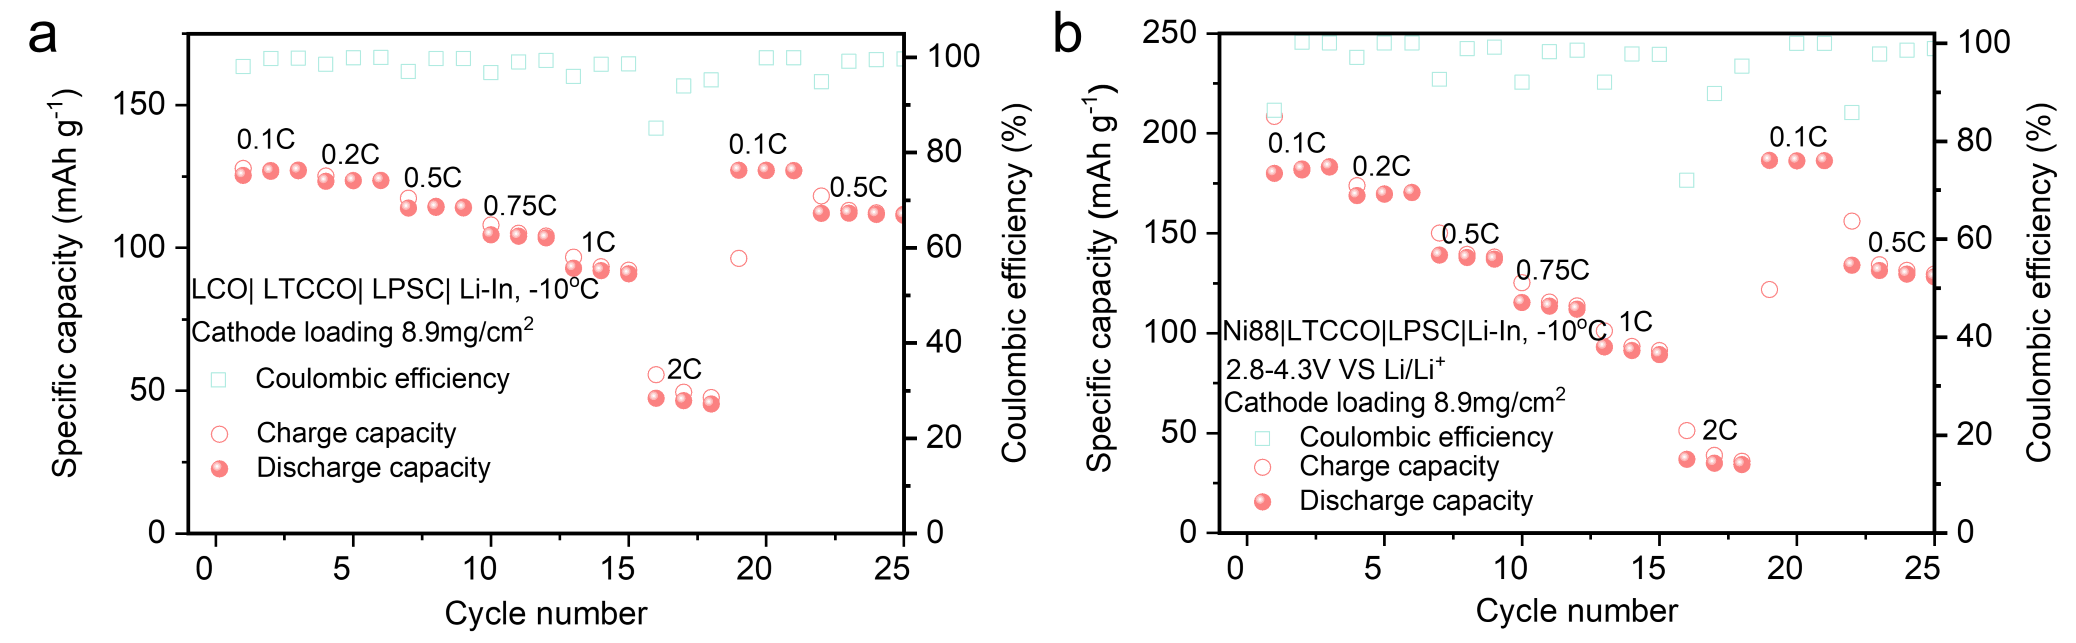


**Supplementary Fig. 25** Rate performance of LCO (**a**), and NCM88 (**b**) ASSBs using LTCCO at −10°C.

**Supplementary Table 1** Summary of the ionic conductivities of the representative SEs

| **Inorganic SSE**  **category** | **Materials** | **Ionic conductivity**  **at 25oC (S cm-1)** | **Ref.** | |
| --- | --- | --- | --- | --- |
| **Sulfide** | Li9.54Si1.74P1.44S11.7Cl0.3 | 2.5 × 10-2 | Nat. Energy 2016, 1 (4),16030. | |
| Li10GeP2S12 | 1.2 × 10-2 | Nat. Mater. 2011, 10 (9), 682-686. | |
| Li6.6Si0.6Sb0.4S5I | 1.5 × 10-3 | J. Am. Chem. Soc. 2019, 141(48), 19002-19013. | |
| Li6PS5X (X = Cl, Br) | 5.4 × 10-3 | J. Am. Chem. Soc. 2018, 140(47), 16330-16339 | |
| 1.0 × 10-3 | Angew. Chem. Int. Ed. 2008, 47 (4), 755-758. | |
| Li5.5PS4.5Cl1.5 | 9.4 × 10-3 | Angew. Chem. Int. Ed. 2019, 58 (26), 8681-8686 | |
| Glass-ceramic Li7P3S11 | 3.2 × 10-3 | Adv. Mater. 2005, 17 (7), 918-921. | |
| **Oxide** | Li7La3Zr2O12 system | 10-4 ~10-3 | Angew. Chem. Int. Ed. 2007, 46,7778–7781; Chem. Mater. 2014,26, 3610–3617; Chem. Mater.2016, 28, 2384–2392; ACS Appl. Mater. Interfaces 2017, 9, 1542–1552; Chem. Mater. 2017, 29,1769–1778; | |
| LiTi2(PO4)3 system | ~10-4 | J. Electrochem. Soc. 1990, 137, 1023-1027; Acc. Chem Res. 1994, 27, 265–270. | |
| LiGe2(PO4)3 system | ~10-3 | J. Electrochem. Soc. 2008, 155, A915–A920; Solid State Ionics 2016, 289, 180–187. | |
| Li3xLa2/3 − xTiO3 | ~10-4 | Solid State Commun. 1993, 86,10, 689-693 | |
| 100[Li1.5Cr0.5Ti1.5(PO4)3]-  5SiO2 | 2.14 × 10−2 | J. Non-Cryst. Solids 2015, 409,120–125 | |
| **Halide** | Li2ZrCl6 | 8.1 × 10-4 | Nat. Commun. 2021, 12(1), 1-  11 |
| Li3YCl6 | 5.1 × 10-4 | Adv. Mater. 2018, 30 (44),  1803075 |
| Li3YBr6 | 1.7 × 10-3 | Adv. Mater. 2018, 30 (44),  1803075 |
| Li3InCl6 | 2.0 × 10-3 | Angew. Chem. Int. Ed. 2019, 58 (46), 16427-16432 |
| Li3ScCl6 | 3.0 × 10-3 | J. Am. Chem. Soc. 2020, 142  (15), 7012-7022 |
| Li2Sc2/3Cl4 | 1.5 × 10-3 | Energy Environ. Sci. 2020, 13  (7), 2056-2063 |
| **Dual-anion amorphous SEs** | 1.6Li2O-TaCl5 | 6.6× 10-3 | Nat Commun.2023,14, 3780 |
| 1.5Li2O-HfCl4 | 1.97× 10-3 | Nat Commun.2023,14, 3780 |
| 1.5Li2O-ZrCl4 | 1.3× 10-3 | J. Am. Chem. Soc. 2024, 146, 2977−2985 |
| Li1.75ZrCl4.75O0.5 | 2.42× 10-3 | Nat Commun.2023,14, 3807 |
| Li3N-TaCl5 | 7.34× 10-3  (30℃) | Angew. Chem. Int. Ed. 2024, e202415847 |
| 0.4125Li3N-TaCl5 | 5.91× 10-3 | Nat Commun. 2025,16, 143. |
| Li1.5Zr0.5Ta0.5Cl5.0O0.5 | 3.88× 10-3 | J. Am. Chem. Soc. 2025, 147, 23170−23179 |

**Supplementary Table 2**. Structural parameters of *x*Li2CO3-TaCl5 (*x* = 0.8, 0.9, 1.0 and 1.1) amorphous SEs extracted from Ta *L3*-edge EXAFS fittings.

|  |  | 0.8Li2CO3-TaCl5 | 0.9Li2CO3-TaCl5 | 1.0Li2CO3-TaCl5 | 1.1Li2CO3-TaCl5 |
| --- | --- | --- | --- | --- | --- |
| Ta-O  path | CN | 4.537 | 4.094 | 4.345 | 5.864 |
| d (Å) | 1.862 | 1.872 | 1.877 | 1.910 |
| σ2(Å2) | 0.003 | 0.018 | 0.004 | 0.004 |
| Ta-Cl path | CN | 3.996 | 4.171 | 3.898 | 4.05 |
| d (Å) | 2.518 | 2.557 | 2.453 | 2.305 |
| σ2 (Å2) | 0.016 | 0.003 | 0.018 | 0.009 |

*CN, coordination number; d (Å), bonding distance; σ2, Debye-Waller factor; Ta-O path is from the crystal structures of Ta2O5 (mp-10390). Ta-Cl path from the crystal structure of TaCl5 (mp-29831). The fitted k range was set to be 2–12 Å−1, and the fitted *R* range was set to be 1−2.6 Å. A *k2* weighting was used.

**Supplementary Table 3.** Summary of the electrochemical performances of ASSBs operating at low temperature

| Battery | Lowest working temperature ( °C) | Capacity retention vs. RT (%) | Current density (mA/cm2) | Ref. |
| --- | --- | --- | --- | --- |
| In|Li6PS5Cl|NCM622 | −30 | 60 | 0.053 | Chem. Commun***.***, 2018,54, 14116-14119 |
| Li-In|65Li2S-30P2S5 5Li2O |Li3InCl6|NCM622 | −20 | 45.7 | 0.08 | Rare Met. 41, 106–114. |
| Li-In|Li5.6PS4.6Br1.4|NCM622 | −20 | 67.7 | 0.0064 | Materialia 26, 101603. |
| Li-In|Li5.5PS4.5Cl1.5|NCM622 | −20 | 26.6 | 0.8 | Chem. Eng. J. 430, 132896. |
| Li-In|Li6PS5I|NCM712 | −20 | 23.4 | 0.024 | Rare Met. 41, 798–805. |
| Li-In|Li5.5PS4.5Cl1.5|LNO@NCM712 | −20 | 50.4 | 0.044 | Energy Storage Mater. 43, 53–61. |
| Li-In|Li5.5PS4.5Cl1.5|LNO@NCM712 | −20 | 50.0 | 0.016 | Energy Environ. Mater. 6, 12308. |
| Li-In|Li5.5PS4.5Cl1.5|NCM811 | −20 | 60.8 | 0.0063 | J. Power Sources 520, 230890. |
| Li-In|Li5.5PS4.425O0.075Cl1.5|NCM811 | −20 | 59.2 | 0.016 | ACS Appl. Mater. Interfaces 14, 4179–4185. |
| μSi|Li6PS5Cl|NCM811 | −20 (discharge) | 36.7 | 0.3 | Science 373, 1494–1499. |
| Ag-C|Li6PS5Cl|Li2O-ZrO2 @NCM90(LiNi0.90Co0.05Mn0.05O2) | −10 (discharge) | 47 | 0.68 | Nat. Energy 5, 299–308. |
| Li-In|Li6PS5Cl| Li3InCl6|NCM (LiNi0.90Co0.06Mn0.04O2) | −20 | 54.7 | 0.1 | Energy Environ. Sci. 16, 4453–4463. |

| Li4Ti5O12|LGPS|LNO@LCO | −30 (discharge) | 92.6 ( 68.1) | 0.06 (0.6) | Nat. Energy 1, 1–7. |
| --- | --- | --- | --- | --- |
| Li-In|Li9.54 [Si0.6Ge0.4]1.74 P1.44  S11.1Br0.3O0.6|LNO@LCO | −10 (discharge) | 75 | 0.587 | Science 381, 50–53. |
| Li-In|Li10SnP1.84Sb0.16S11.6O0.4 |LNO@LCO | −20 | 75 | 0.069 | Chem Electro Chem 9, e202200156. |
| Li-In|Li6PS5Cl|Li3InCl6|LCO | −30(−10) | 53.8 (74.9) | 0.06 (0.48) | Adv. Funct. Mater. 32, 2205594. |
| Li-In|Li6PS5Cl|Li3InCl6|LCO|GLC@Al | −10 | 75.2 | 0.03 | Adv. Funct. Mater. 32, 2200767. |
| Li-In|Li6PS5Cl|1.6Li2O-TaCl5|LCO | −10 | 74.5 | 0.125 | Nat. Commun. 14, 3780. |
| Li|Li6.5La3Zr1.5Ta0.5O12|LCO | 10 (discharge) | 20 | 0.0567 | Small 19, e2301904. |
